# 1 Persistence of the primary somatosensory system in zebrafish

2 Joaquín Navajas Acedo<sup>1,2</sup>

3 <sup>1</sup>Biozentrum at University of Basel, Spitalstrasse 41, Basel, Switzerland

4 <sup>2</sup> Allen Discovery Center for Cell Lineage Tracing, University of Washington, Seattle, WA, USA

5 Correspondence: [joaquin.navajasacedo@unibas.ch](mailto:joaquin.navajasacedo@unibas.ch)

6 ORCID: <https://orcid.org/0000-0003-2855-6660>

7 Twitter/X: [@mads100tist](https://twitter.com/mads100tist)

8 -----

9 **Abstract** The somatosensory system detects peripheral stimuli that are translated into behaviors  
10 necessary for survival. Fishes and amphibians possess two somatosensory systems in the trunk: the  
11 primary somatosensory system, formed by the Rohon-Beard neurons, and the secondary  
12 somatosensory system, formed by the neural crest cell-derived neurons of the Dorsal Root Ganglia.  
13 Rohon-Beard neurons have been characterized as a transient population that mostly disappears during  
14 the first days of life and is functionally replaced by the Dorsal Root Ganglia. Here, I follow Rohon-Beard  
15 neurons *in vivo* and show that the entire repertoire remains present in zebrafish from 1-day post-  
16 fertilization until the juvenile stage, 15-days post-fertilization. These data indicate that zebrafish retain  
17 two complete somatosensory systems until at least up to a developmental stage when the animals  
18 display complex behavioral repertoires.

19

20 Keywords: Rohon-Beard, Dorsal Root Ganglia, Somatosensory Neuron, Neural Development, Cell Death,  
21 Zebrafish

22 -----

## 23 Introduction

24 The somatosensory system of animals detects peripheral stimuli, such as touch, temperature, or  
25 noxious chemicals (Abraira and Ginty, 2013; Basbaum et al., 2009; Cevikbas and Lerner, 2020; Dhaka et  
26 al., 2006; Meltzer et al., 2021, 2021; Woolf and Ma, 2007). In vertebrates, the somatosensory system of  
27 the head is formed by neurons of the Trigeminal Ganglia (Dyck and Thomas, 2005). In the trunk, the

28 situation varies between amniotes and anamniote vertebrates such as fishes and amphibians. While the  
29 somatosensory system of the trunk in amniotes is formed by neurons of the Dorsal Root Ganglia (DRG),  
30 which are neural crest cell-derived (Le Douarin and Kalcheim, 1999), anamniote vertebrates possess  
31 two somatosensory systems during development: the primary somatosensory system and the  
32 secondary somatosensory system. The primary somatosensory system develops first and is formed by  
33 the Rohon-Beard (RB) neurons (Beard, John, 1890; Bernhardt et al., 1990; Coghill, 1914; Freud, 1878;  
34 Freud, Sigmund, 1877; Hughes, 1957; Ogino and Hirata, 2018; Rohon, Josef Victor, 1884). RB neurons  
35 are bipolar neurons present on the dorsal part of the spinal cord, and participate in the escape response  
36 (Clarke et al., 1984; Hartenstein, 1993; Hirata and Iida, 2018; Kimmel, CB and Westerfield, M, 1990;  
37 Roberts and Clarke, 1982; Roberts and Smyth, 1974; Shorey et al., 2021; Umeda et al., 2016). RB  
38 neurons possess a characteristic large spherical body and extend their highly arborized sensory  
39 neurites to the periphery around 18 hours post-fertilization (hpf) in zebrafish (Eisen, 1991; Sagasti et  
40 al., 2005; Saint-Amant and Drapeau, 1998). Around the same stage, the neural crest cells of the trunk  
41 migrate out of the neural tube (Raible et al., 1992; Theveneau and Mayor, 2012) and start  
42 differentiating into DRGs, the secondary somatosensory system (An et al., 2002; Raible et al., 1992;  
43 Raible and Eisen, 1994; Wright and Ribera, 2010). Concomitantly to the maturation of the DRGs, RBs  
44 are thought to undergo gradual programmed cell death, and their replacement by the DRG is  
45 considered to be complete at around 5 days post-fertilization (dpf) in zebrafish (Cole and Ross, 2001;  
46 Lamborghini, 1987; Reyes et al., 2004; Svoboda et al., 2001; Williams et al., 2000). RBs show markers  
47 for cell death, including Terminal deoxynucleotidyl transferase dUTP nick end labeling (TUNEL),  
48 activated Caspase 3, or Annexin V during their disappearance and functional replacement by the DRGs  
49 in fish and frogs (Coen et al., 2001; Cole and Ross, 2001; Kanungo et al., 2006; Reyes et al., 2004;  
50 Svoboda et al., 2001, 2001; Williams et al., 2000; Williams and Ribera, 2020). While programmed cell  
51 death of RBs is dependent on electrical activity, neurotrophin, Cdk5 or BCL signaling (Coen et al., 2001;  
52 Kanungo et al., 2006; Nakano et al., 2010; Ogino and Hirata, 2018; Pineda et al., 2006; Svoboda et al.,  
53 2001; Williams et al., 2000), it is independent of the formation of DRGs (Honjo et al., 2011; Reyes et al.,  
54 2004).

55 RBs were originally regarded to completely disappear during development; however, recent  
56 observations in zebrafish challenged this view and documented that up to 40% of the RBs survive to  
57 juvenile stages (Palanca et al., 2013; Williams and Ribera, 2020). Here, I report that the complete  
58 repertoire of RBs present at 1 dpf remains until 15 dpf and show no significant signs of cell death.

59

## 60 **Results**

### 61 **The complete trunk repertoire of RBs survives until at least 5 dpf in zebrafish**

62 To understand the development of the primary somatosensory system through the dynamics of  
63 RBs loss, I investigated (i) where in the trunk and (ii) when each of the RBs disappears. I repeatedly and  
64 comprehensively followed *in vivo* the RBs of individual fish from 1 dpf until 5 dpf using an *isl2b:GFP*  
65 transgenic line that labels all RBs (Pittman et al., 2008) (Figure 1). The *isl2b:GFP* transgenic line labels  
66 both RBs and Dorsal Longitudinal Ascending (DoLA) interneurons throughout early development, and  
67 additionally DRG neurons from 2-3 dpf onwards (Williams and Ribera, 2020; Won et al., 2012). RBs  
68 were identified by their dorsal position and characteristic large soma, while DoLA were identified based  
69 on their smaller size and adjacent position to the dorsal longitudinal fasciculus (Figure 1). DRGs were  
70 identified based on their location outside the spinal cord. RBs start as two bilateral populations that  
71 converge medially (Fig. 1, compare top vs bottom panel) (Williams and Ribera, 2020). Despite their  
72 change in position, in all embryos analyzed (n=3), all trunk RB neurons present at 24 hpf could be  
73 accounted for throughout the entirety of the experimental period, until 5 dpf. These results indicate  
74 that all RBs survive past hatching (~2-3 dpf) until free-swimming larva stages (5 dpf).

75

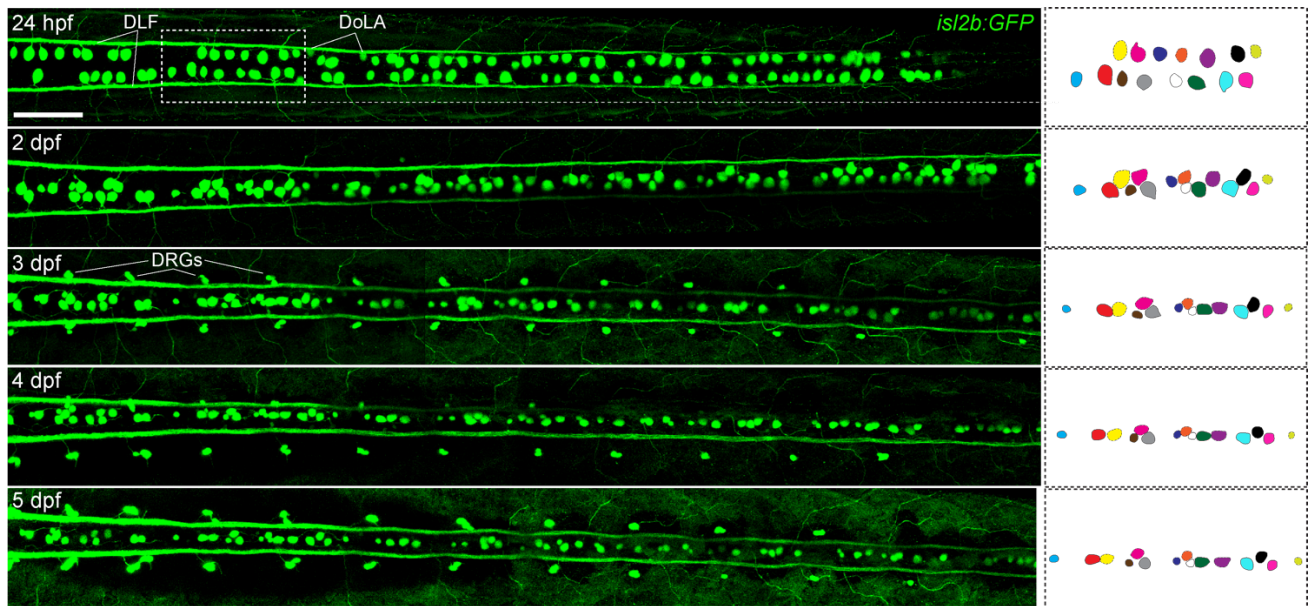

76

77 **Figure 1. All *isl2b:GFP*+ RBs present at 24 hpf can be accounted for at 5 dpf.** Repeated dorsal *in vivo* imaging of the same  
78 larva from the first until the fifth day of life reveals that all RBs present in the trunk survive during this period of time. The  
79 drawings on the right represent the same RBs throughout time, starting from the dotted box area at 24 hpf. Scale bar equals  
80 100 $\mu$ m. hpf – hours post-fertilization; dpf - days post-fertilization; DoLA – Dorsal Longitudinal Ascending neurons; DRG –  
81 Dorsal Root Ganglia; DLF – Dorsal Longitudinal Fasciculi.

82

### 83 **The zebrafish trunk elongates as RB converge towards the midline**

84 The comprehensive tracking revealed that all RBs are present until 5 dpf and their bodies  
85 converge medially, ending up in approximately a single row ([Fig. 1](#))(Williams and Ribera, 2020).  
86 Interestingly, the bodies of RB neurons seem to get displaced antero-posteriorly ([Fig. S1](#), compare top  
87 vs bottom panels). A time-lapse video of an *isl2b:GFP* transgenic line shows this effect *in vivo* from 1 to 2  
88 dpf ([Video 1](#)). I then wondered if this displacement was exclusive to RBs or whether the surrounding  
89 tissues also participate. To characterize the ongoing elongation of the trunk and RB convergence to the  
90 midline, I injected *isl2b:GFP* embryos with mRNA encoding a photoconvertible nuclear-localized Kaede  
91 ([Figure 2](#)) and followed the photoconverted area and the individual RBs. In all analyzed samples, the  
92 space between the two photoconverted areas increased between 24 hpf and 3 dpf ([Fig. 2](#) top vs bottom;  
93  $n=3$ , mean distance 1 vs 1.391,  $p$ -val= 0.0004). Together, these data indicate that there is not only a  
94 convergence of RBs towards the midline, but also antero-posterior displacement due to the  
95 concomitant extension of the trunk.



96

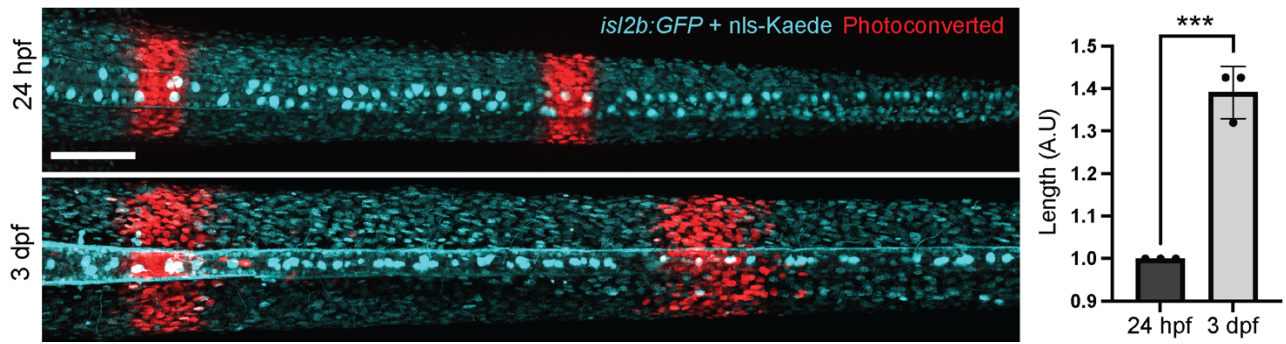

97

98 **Figure 2. Photoconversion indicates the concomitant trunk elongation and medial convergence of RBs.** Two stripes  
99 were photoconverted on the trunk of *isl2b:GFP* fish injected with a nuclear-localized Kaede (nls-Kaede). The images were  
100 aligned using the anteriormost photoconverted area, revealing the space between the two stripes increased (n=3; Mean length  
101 of '1' at 24hpf, versus '1.391' at 3 dpf). Asterisks indicate statistical significance. Scale bar equals 100 $\mu$ m. hpf — hours post-  
102 fertilization; dpf — days post-fertilization.

103

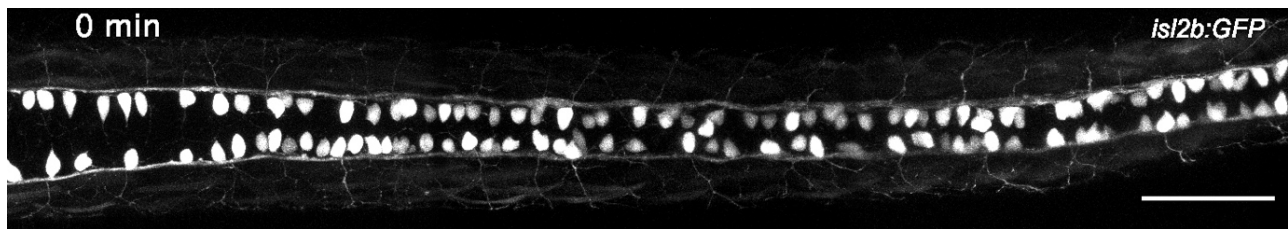

104

105 **Video 1. Time lapse of medial convergence of RB neurons from 24 hpf to 48 hpf.** *In vivo* time-lapse imaging of the dorsal  
106 spinal cord of a *isl2b:GFP* transgenic line from 24 to 48 hpf (Dorsal view). One frame corresponds to 30 minutes. Scale bar  
107 equals 100 $\mu$ m.

108

### 109 **The vast majority of RBs survive until juvenile stages**

110 The data above shows no decline in the number of RBs during the first days of life and full  
111 survival until 5 dpf (Fig. 1). To test how many RBs survive to juvenile stages, I followed the same  
112 animals from 3 dpf —when the medial convergence has ended (Fig. 1)- until 15 dpf. RBs can be  
113 identified at 15 dpf based on their medial location and expression of *isl2b:GFP* (Figure 3)(Won et al.,  
114 2012, 2011). As the animal grows in length, the space between RBs continues to increase overall  
115 (compare Fig. 3 3 dpf vs 15 dpf). Furthermore, 97-100% of RBs present at 3 dpf survived until 15 dpf in

116 my imaging conditions and analyzed animals (Fig. 3, Supplementary Table 1, n=5). Altogether, this data  
117 indicates that the vast majority of RBs survive until juvenile stages in zebrafish.

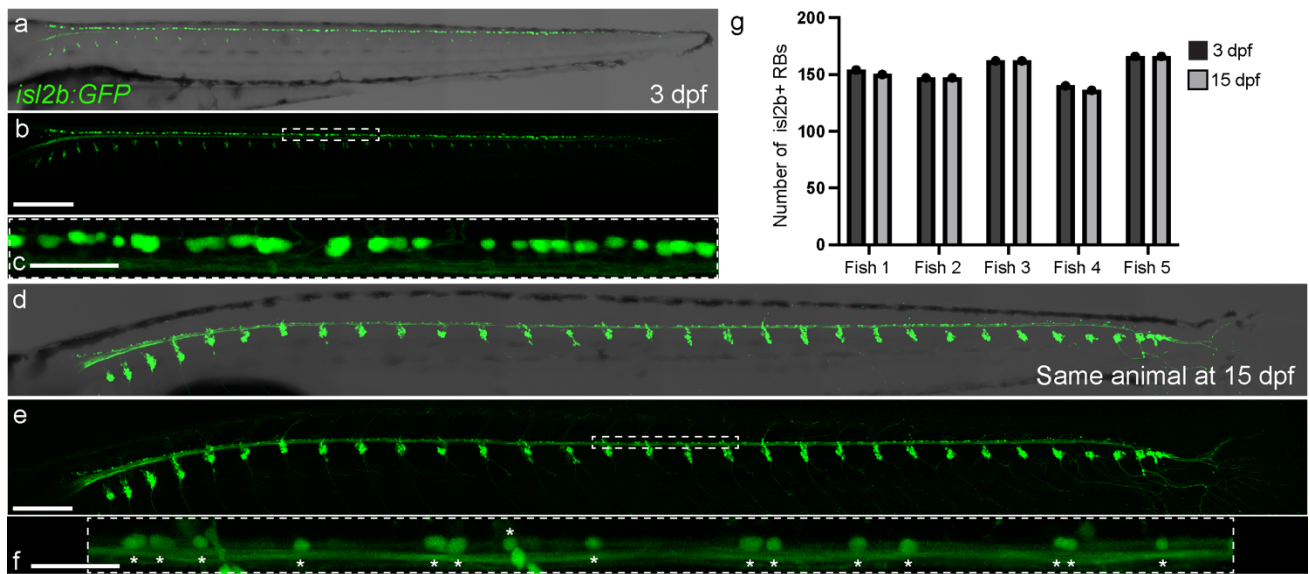

118  
119 **Figure 3. The vast majority of RBs survive until juvenile stages.** Imaging of the same *isl2b:GFP* transgenic animal at 3 (a-c)  
120 and 15 dpf (d-f) show that the majority of RBs are still present in the spinal cord of 15 dpf zebrafish and the distance between  
121 them increased. (c and f) Both images show the same area between DRGs number 16 and 19 (delineated in b and e). Asterisks  
122 in (f) label RBs at 15 dpf. Because of the time resolution, the exact RB identity between the 3 and 15 dpf time points could not  
123 be established. (g) Quantification of the number of RBs per animal at 3 and 15 dpf (exact numbers in Supplementary Table 1).  
124 Scale bars in (a-b and d-e) equal 250 $\mu$ m, and 50 $\mu$ m in (c) and (f). Images from 3 dpf and 15 dpf are to scale to each other to  
125 reflect the amount of growth. dpf — days post-fertilization.

126

### 127 RBs do not show signs of programmed cell death at 24 hpf

128 Given the persistence of RBs through 5dpf, and until juvenile stages (Fig. 1 and 3, Video 1), I  
129 next tested whether cell death markers were distributed in any discernible pattern that may suggest a  
130 biological role other than cell death. To detect cell death markers, I used two different methods  
131 previously reported in RBs: a Sec5A-YFP fluorescent reporter, which labels fluorescently flipped  
132 phosphatidylserine groups in cells undergoing apoptosis (Ham et al., 2010; Williams and Ribera, 2020),  
133 and TUNEL (Reyes et al., 2004; Svoboda et al., 2001; Williams et al., 2000). In my assays, RBs did not  
134 show sec5A-YFP signal at 24 hpf (Figure 3a, Fig. S2, n=12); however, other previously reported cells  
135 types outside the spinal cord using this transgenic line showed reproducible sec5A-YFP signal,

136 confirming the functionality of the reporter in my experimental setting (Fig. 3a, arrowheads)(Ham et al.,  
137 2010). Furthermore, RBs did not show significant TUNEL staining (Figure 3b-d). In all animals analyzed  
138 (n=9), only one TUNEL+ RB neuron was found, but other nearby cells in the skin and spinal cord did  
139 show robust TUNEL staining, confirming the functionality of the assay (Fig. 3b-c). Together with my *in*  
140 *vivo* imaging and comprehensive tracking, these results argue for a persistence of RB neurons in  
141 zebrafish until at least 15 dpf with little to no reduction of initial RB neuron numbers due to  
142 programmed cell death.

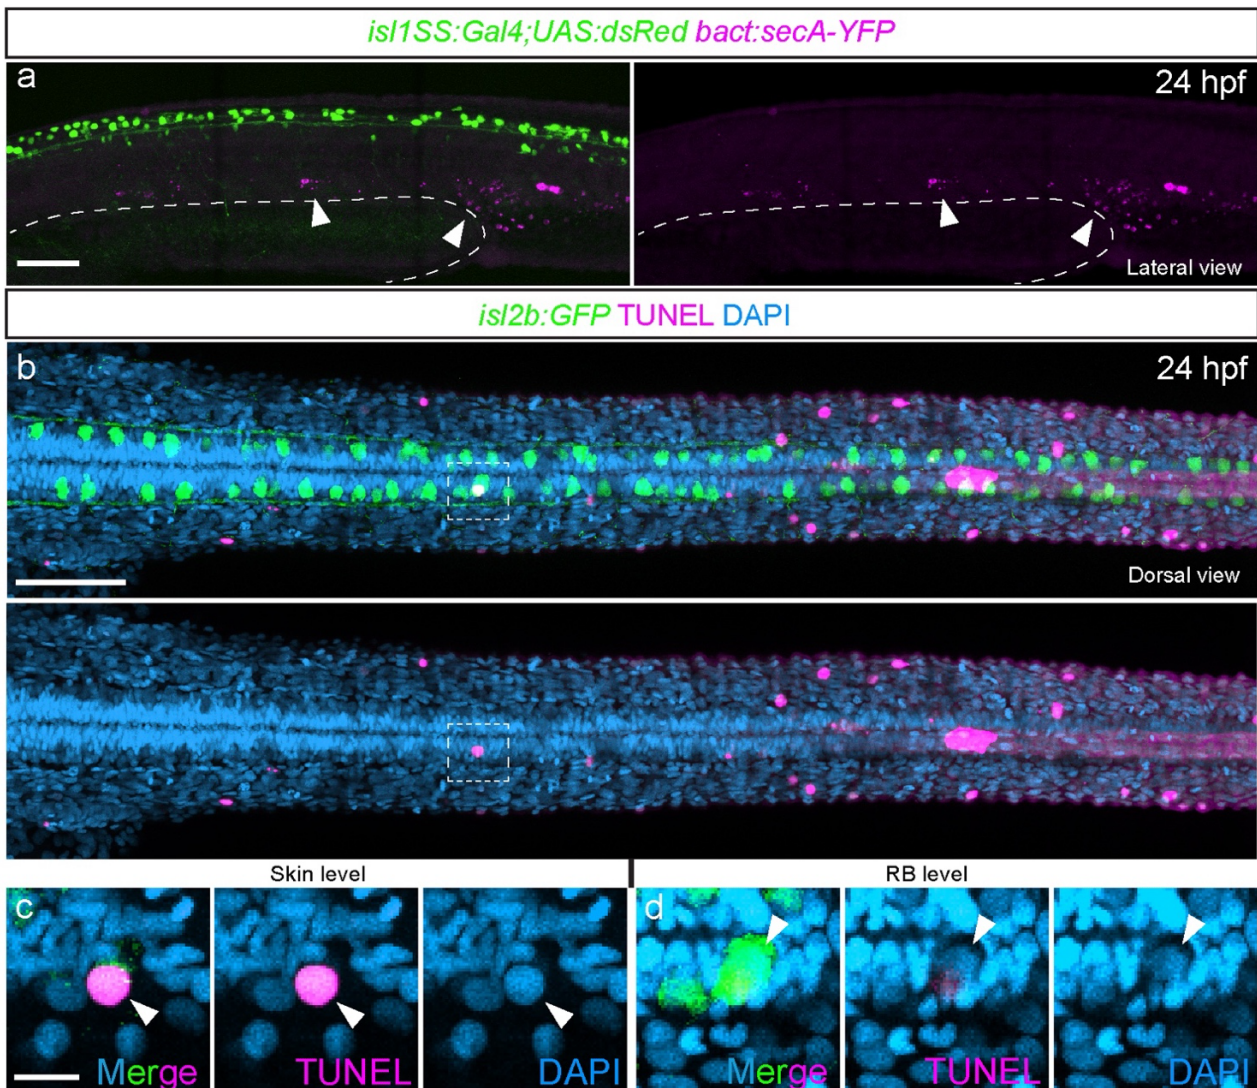

143  
144 **Figure 4. RBs do not show SecA5-YFP or TUNEL signal at 24hpf.** Images showing lateral (upper; a) and dorsal views (lower;  
145 b-d) of two different experiments assessing cell death. (a) *secA5-YFP* is driven by a ubiquitous beta-Actin promoter, and none  
146 of the *dsRed*+ RBs were *secA5-YFP*+. Some cells around the pronephros area were *secA5-YFP*+ (arrowheads) (n=12). The  
147 yolk extension is delineated by a dashed line. (b) A dorsal view of an *isl2b:GFP*+ embryo stained for TUNEL. None of the RBs



148 were TUNEL positive, but some surrounding cells were (n=9). Inset (dashed line in b) shows the TUNEL+ nucleus of a skin cell  
149 (c, arrowhead) and the RB immediately underneath (d, arrowhead). Scale bars equal 100 $\mu$ m in a- b, and 10 $\mu$ m in c-d,  
150 respectively. hpf — hours post-fertilization.

151

## 152 **Discussion**

153           Since their first description in the late 1800s (Beard, John, 1890; Freud, 1878, 1878; Rohon,  
154 Josef Victor, 1884), RB neurons have attracted the attention of both developmental biologists and  
155 neuroscientists due to their large soma size, their accessibility to electrophysiological recordings and  
156 imaging, and their function in somatosensation and escape response (Artinger et al., 1999; Bernhardt et  
157 al., 1990; Blader et al., 2003; Douglass et al., 2008; Henderson et al., 2020, 2019; Hubbard et al., 2016;  
158 Jacobson, 1981; Kaji and Artinger, 2004; Knafo et al., 2017; Lamborghini, 1987; Moreno and Ribera,  
159 2014; Nieuwenhuys, 1964; O'Brien et al., 2012; Ogino and Hirata, 2018; Park et al., 2012; Rossi et al.,  
160 2009, 2008; Spitzer, 1984, 1982). Previous reports described the total or partial disappearance of RB  
161 neurons starting at around the first day of life in fishes (Bernhardt et al., 1990; Henion et al., 1996;  
162 Metcalfe et al., 1990; Metcalfe and Westerfield, 1990; Ogino and Hirata, 2018; Reyes et al., 2004;  
163 Svoboda et al., 2001; Williams et al., 2000; Williams and Ribera, 2020). In contrast to these  
164 observations, the data presented here indicate that the entire repertoire of RB neurons survives until  
165 juvenile stages. First, comprehensive tracking between 1 and 5 dpf shows that all RBs can be accounted  
166 for even if they undergo medial and antero-posterior displacement. Second, the vast majority if not all  
167 RBs survive until 15 dpf. Finally, RBs do not display a significant presence of classical apoptotic  
168 markers.

169

## 170 **Revealing the persistence of RB neurons with live imaging**

171           What factors and experimental settings might have led to the conclusion that RB neurons disappear  
172 during zebrafish development? Previous characterizations of RB disappearance during development  
173 were based on either (i) reporting an average number of RBs per somite, (ii) imaging of animals  
174 laterally rather than dorsally, (iii) quantification of RB number in fixed animals, and/or (iv) use of  
175 markers (e.g HNK1/zn-12, *isl1SS* enhancer) that might stop being expressed or not be expressed in all

176 RBs (Appel et al., 1995; Eisen and Pike, 1991; Grunwald et al., 1988; Harris and Whiting, 1954; Joya et  
177 al., 2014; Metcalfe et al., 1990; Nakano et al., 2010; Nordlander, 1989; Palanca et al., 2013; Pineda et al.,  
178 2006; Reyes et al., 2004; Takamiya and Campos-Ortega, 2006; Tamme et al., 2002; Tongiorgi et al.,  
179 1995; Uemura et al., 2005; Williams et al., 2000; Williams and Ribera, 2020; Won et al., 2012, 2011).  
180 Furthermore, recent work demonstrated that the characteristic large RB soma size decreases over time  
181 (Williams and Ribera, 2020), making it difficult to differentiate RBs from other spinal cord neurons  
182 using antibodies such as Isl1/2/39.4D5 or Elavl3/HuC (Rossi et al., 2009; Segawa et al., 2001).  
183 Considering the comprehensive *in vivo* tracking data presented here (Fig. 1), the fact that RBs converge  
184 medially and that the trunk extends concomitantly (Fig. 2 and 3, and Video 1), it is possible that the  
185 combination of these processes has contributed to the interpretation of RB numbers decreasing over  
186 time. For example, fixed samples of different animals might suggest that RBs disappear when in fact  
187 they redistribute along the elongating trunk and thus *de facto* decrease their density. The  
188 comprehensive longitudinal tracking method employed here complements prior approaches, and  
189 underlines the utility of tracking all RBs on a per-animal basis in the context of concurrent  
190 developmental processes.

191 Cell death by apoptosis critically contributes to sculpting the nervous system during development  
192 (Burek and Oppenheim, 1996; Charvet et al., 2011; Dekkers et al., 2013; Malin and Shaham, 2015; Pop  
193 et al., 2020). However, in my described assays and conditions, I did not detect any significant presence  
194 of cell death markers in RB neurons (Fig. 4). Previous publications have described the presence of cell  
195 death markers in RB neurons, including activated Caspase-3, TUNEL and Annexin V (Coen et al., 2001;  
196 Cole and Ross, 2001; Ham et al., 2010; Kanungo et al., 2006; Reyes et al., 2004; Svoboda et al., 2001,  
197 2001; Williams et al., 2000; Williams and Ribera, 2020). These reports showed that not all cells that are  
198 secA5-YFP+ are TUNEL+ (Dong et al., 2011; Ham et al., 2010; Williams and Ribera, 2020), and a  
199 negligible number of RBs express activated Caspase-3 per embryo (Williams and Ribera, 2020). These  
200 observations contrast with other populations of neurons that undergo apoptosis in zebrafish (Mazaheri  
201 et al., 2014). While apoptosis of a few cells cannot be ruled out, my observations using SecA5-YFP and

202 TUNEL indicate that cell death is not a common fate of RB neurons in the first 15 days of zebrafish  
203 development.

204 If cell death markers are not necessarily labeling programmed cell death in RBs, what concomitant  
205 process might they reflect? The cell death machinery has non-apoptotic roles in neurons and is involved  
206 in axon pruning or pathfinding (Mukherjee and Williams, 2017). Furthermore, double strand breaks in  
207 the DNA contribute to neuron maturation, through control of gene diversification, induction of gene  
208 expression, or cytoskeletal dynamics (Akagawa et al., 2021; Alt and Schwer, 2018; Álvarez-Lindo et al.,  
209 2022; Kellermeyer et al., 2018; Madabhushi et al., 2015). RB neurons expressing markers associated  
210 with cell death might instead still be in the process of maturation or remodeling their sensory axons  
211 while reaching their peripheral targets.

212

## 213 **Outlook**

214 The data presented here show that the entire repertoire of zebrafish RB neurons that are present  
215 during the first day of life persists until juvenile stages. My study raises several questions about the fate  
216 and roles of RBs. First, is survival of RBs exclusive of fishes? The data presented here argues against  
217 prominent neuron disappearance through programmed cell death during development of the  
218 somatosensory system of zebrafish. However, this situation might be exclusive to fishes and not  
219 translate to amphibian models, which possess RBs during early stages of development but undergo a  
220 more dramatic metamorphosis process that involves major remodeling of the nervous system (Coen et  
221 al., 2001; Coghill, 1914; Eichler and Porter, 1981; Kerr et al., 1972; Kollros and Bovbjerg, 1997;  
222 Lamborghini, 1987; Nishikawa, 2012).

223 Second, do RBs act as pioneer neurons upon which the DRG system builds? RBs and DRGs overlap  
224 during a substantial amount of time (Fig. 1 and 3), including the period of free-swimming larva and  
225 acquisition of complex behaviors. Several systems are built using pioneer neurons, including  
226 innervation of the limbs in grasshoppers (Bentley and Keshishian, 1982), CNS development in  
227 *Drosophila* (Hidalgo and Brand, 1997), Cajal-Retzius and subplate neurons in mammals (Frotscher,  
228 1997; McConnell et al., 1989; Meyer et al., 1998), and neurons of the CNS, statoacoustic ganglion and



229 olfactory system in zebrafish (Bañón and Alsina, 2023; Whitlock and Westerfield, 1998; Wilson and  
230 Easter, 1991). RB and DRG peripheral arbors overlap (Wright and Ribera, 2010), and while the DRGs  
231 are not necessary for RB development (Honjo et al., 2011; Reyes et al., 2004), whether RB neurons  
232 participate during the development of the secondary somatosensory system is unknown.

233 Third, what are the physiological and behavioral consequences of having two functional  
234 somatosensory systems in the trunk? Do RBs and DRG neurons complement each other functionally? In  
235 zebrafish, DRGs and RBs express a shared set of receptors and signaling molecules related to their  
236 somatosensory function, including NTRKs, purinergic receptors, *scn8aa*/Nav1.6, and PKCa (Kucenas et  
237 al., 2006; Martin et al., 1998; Palanca et al., 2013; Patten et al., 2007; Pineda et al., 2006; Tuttle et al.,  
238 2023; Won et al., 2012). Both RBs and DRGs innervate the skin and specialized structures such as the  
239 pectoral fin and scales (Henderson et al., 2020, 2019; O'Brien et al., 2012; Rasmussen et al., 2018), and  
240 their sensory processes overlap substantially (Wright and Ribera, 2010). Future studies comparing the  
241 activity and function of RBs and DRGs will help reveal the overlapping or split roles these  
242 somatosensory systems may have.

243

## 244 **Materials and Methods**

### 245 **Fish Husbandry**

246 Zebrafish lines were raised under standard light-dark conditions (14-10 hours) and fed a  
247 standard diet of Artemia and Dry food 4 times a day. All zebrafish experiments were performed  
248 according to the Swiss Law and the Kantonales Veterinäramt of Kanton Basel-Stadt (licenses #1035H  
249 and #3097). Wild-type TLAB, *Tg(-17.6kb isl2:mmGFP5)<sup>cz7</sup>* (referred to as *isl2b:GFP* throughout the  
250 manuscript, (Pittman et al., 2008); a kind gift from Dr. Berta Alsina), *Tg(isl1SS:Gal4;UAS:dsRed)<sup>zf234Tg</sup>* (a  
251 kind gift from Dr. A Sagasti; *sensory:RFP* in Palanca et al. (Palanca et al., 2013)) and *Tg(bAct:secA-YFP)*  
252 (this manuscript and (Ham et al., 2010)) zebrafish lines were used. Embryos were obtained by standard  
253 cross protocol, and collected in E3 embryo media (5 mM NaCl, 0.17 mM KCl, 0.33 mM CaCl<sub>2</sub>, 0.33 mM  
254 MgSO<sub>4</sub>, pH 7.2) and kept in an incubator at 28.5C and a 14h light/10h dark cycle. For the experiments  
255 that required from repeated imaging from 24 hpf to 5 dpf, 0.003% 1-phenyl 2-thiourea (PTU) was

256 added to the embryo media to block the formation of pigment. Staging of the embryos was performed  
257 according to Kimmel et al. (Kimmel et al., 1995).

258

### 259 ***Tg(bAct:secA-YFP)* transgenic fish**

260 To generate the *Tg(bAct:secA-YFP)* transgenic fish, the Tol2-bActin:secA-YFP plasmid (Addgene  
261 #105664, a gift from Dr. Qing Deng) was co injected with Tol2 transposase mRNA as previously  
262 described (Suster et al., 2009) into one-cell stage embryos. Then, embryos were screened at 24 hpf for  
263 positive YFP clones and raised until adulthood. The F0 founders were screened for germline integration  
264 of *bAct:secA-YFP* by outcrossing to TLAB wild-type fish, and the F1 progeny raised until adulthood.  
265 Afterwards, F1 stable fish were screened for robust YFP expression by outcross to TLAB wild-type fish,  
266 and the produced F2 progeny raised until adulthood. All experiments were conducted using F3s of the  
267 generated *Tg(bAct:secA-YFP)* transgenic lines.

268

### 269 **Zebrafish mounting and time-lapse Imaging**

270 *isl2b:GFP* positive fish were manually dechorionated, anesthetized using 6.5% MS-222/Tricaine  
271 Methanesulfonate (Sigma-Aldrich, Cat#E10521; 4g/L pH9.0 stock in E3 embryo media) and mounted in  
272 Low Melting Point Agarose (LMP; Sigma-Aldrich, Cat#A-9414) as previously described (Venero  
273 Galanternik et al., 2016) in Glass-Bottom MatTek plates (MatTek). For dorsal views, the dorsal part of  
274 the animal was closer to the coverslip, and fluorescent images were acquired using a Zeiss LSM880  
275 AiryScan, 25X Oil Objective in a heated chamber at 28.5C. The produced time lapse video was time  
276 registered using the '*stackreg*' plugin  
277 ([https://research.stowers.org/imageplugins/ImageJ\\_tutorial2.html](https://research.stowers.org/imageplugins/ImageJ_tutorial2.html)) to maintain the original center of  
278 the field of view stable.

279 For the time-lapses that required from repeated imaging in [Figure 1](#), after each session of  
280 imaging, larvae were retrieved from the LMP and kept in fresh E3 embryo media + 0.003% PTU until  
281 the next imaging session. Images were processed with the commercial software Adobe Photoshop 2021  
282 for Intensity and Contrast, and the Figures were assembled in Adobe Illustrator 2021.

283

## 284 **Photoconversion**

285 mRNA was synthesized using the SP6 mMessenger Machine (Thermo Fisher, Cat#AM1340) and  
286 purified using Zymo RNA Cleaner and Concentrator (Zymo Research, Cat#R1017). nlsKaede mRNA (a  
287 Kind gift from Dr. K Kwan (Kwan et al., 2012)) was injected into one-cell stage eggs from an *isl2b:GFP* to  
288 TLAB cross, under standard conditions. The mRNA was injected at a concentration of 20 pg per embryo,  
289 and eggs were kept in an incubator at 28.5C in the dark to avoid fluorophore bleaching. At 23hpf  
290 embryos were screened for robust expression of both nls-Kaede and the *isl2b:GFP* transgene, and  
291 mounted for imaging in LMP as described above.

292 Photoconversion was performed using the 405 UV laser of a Zeiss LSM880 AiryScan, 25X Oil  
293 Objective, using the 'Regions' and 'Bleaching Setup' of ZEN Software until photoconverted nuclear  
294 Kaede intensity was robust.

295

## 296 **Statistical analysis**

297 Distances between photoconverted areas in [Figure 2](#) were measured in Fiji (Schindelin et al.,  
298 2012) using the 'Line' tool, and converted to ratios of 24 hpf vs 72 hpf values. Unpaired t-test statistical  
299 analysis and data plotting were performed using the commercial software Prism 9.

300

## 301 **Terminal deoxynucleotidyl transferase dUTP nick end (TUNEL) staining**

302 *isl2b:GFP* positive larvae were fixed using 4% PFA in 1X PBS (pH=7.4) at 24 hpf. TUNEL staining  
303 was performed using the In Situ Cell Death Detection Kit (Roche, Cat #11684817910) according to the  
304 manufacturer's specifications. Anti-DIG (in the kit) and anti-GFP (Biozol, Aves GFP-1020; 1:500)  
305 antibodies were co-incubated.

306

## 307 **Acknowledgements**

308 I thank Alex Schier for early input and enthusiastic support of this work, the members of the  
309 Schier Lab for critical feedback on the project, and Mariona Colomer Rosell, Mireia Codina Tobias, Drs.

310 Jialin Liu, Lucia Du, Oded Maysel, Clare Diester, Madalena Pinto, Yinan Wan, and Alex Schier for  
311 critical reading of the manuscript. Thanks to Drs. Christian Mosimann, Catherina Becker, Dave Raible,  
312 Patrick Blader, and Jeff Rasmussen for comments on the manuscript and discussion of the data. I  
313 additionally thank Alba Aparicio Fernandez, Rita Gonzalez and Diana Medeiros Gomes for outstanding  
314 zebrafish husbandry, and the Biozentrum's Imaging Core Facility (IMCF) for their infrastructure  
315 support and assistance. I thank Dr. Berta Alsina for sending the *isl2b:GFP* fish line, Dr. Kristen Kwan for  
316 the pCS2-nls-Kaede plasmid, and Drs. Christian Mosimann, Tim Saunders and Kostantinos Kalyviotis for  
317 providing reagents during pilot experiments. The project was supported by the Allen Discovery Center  
318 for Cell Lineage Tracing.

319

## 320 Declaration of interests

321 I declare I do not have any competing interests

322

## 323 Supplementary Figures

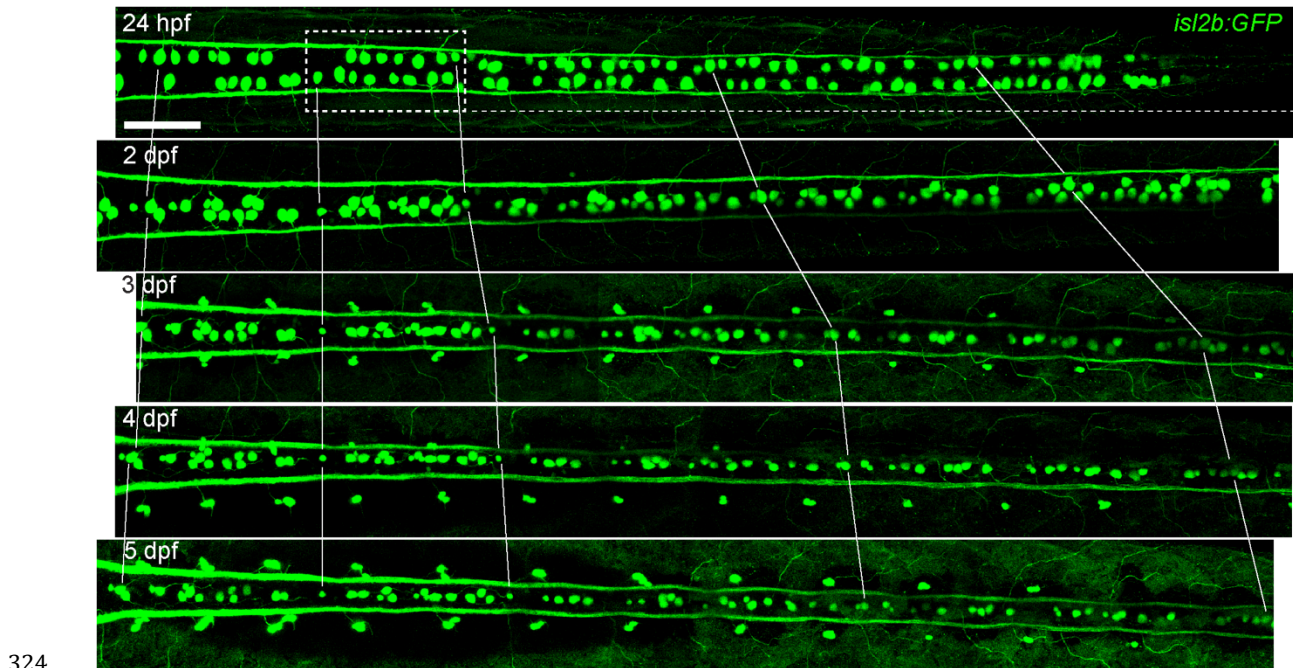

325 **Supplementary Figure 1 to Figure 1.** Lines show the amount of displacement the *isl2b:GFP*+ RBs undergo in the anterior-  
326 posterior axis in [Figure 1](#). Scale bar equals 100 $\mu$ m. hpf — hours post-fertilization; dpf — days post-fertilization.

327

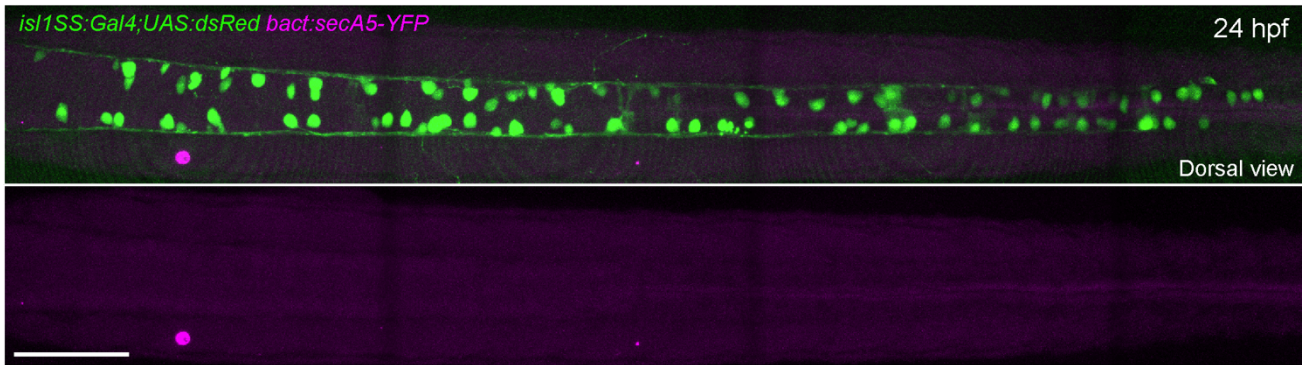

328

329 **Supplementary Figure 2 to Figure 4.** RBs do not show SecA5-YFP (Annexin V) signal at 24 hpf. Images showing a dorsal view  
330 of a *secA5-YFP*+ transgenic embryo. *secA5-YFP* is driven by a ubiquitous beta-Actin promoter. None of the RBs of the trunk  
331 were *secA5-YFP*+. Scale bar equals 100 $\mu$ m. hpf — hours post-fertilization.

| Age    | # of <i>isl2b:GFP</i> + RBs |        |
|--------|-----------------------------|--------|
|        | 3 dpf                       | 15 dpf |
| Fish 1 | 154                         | 150    |
| Fish 2 | 147                         | 147    |
| Fish 3 | 162                         | 162    |
| Fish 4 | 140                         | 136    |
| Fish 5 | 166                         | 166    |

332

333 **Supplementary Table 1 to Figure 3.** *isl2b:GFP*+ RB counts of the same animals at 3 and 15 dpf (Fish 5 is shown in [Figure 3](#)).

334

## 335 References

336

- 337 Abraira, V.E., Ginty, D.D., 2013. The Sensory Neurons of Touch. *Neuron* 79, 618–639.  
338 <https://doi.org/10.1016/j.neuron.2013.07.051>
- 339 Akagawa, R., Nabeshima, Y., Kawachi, T., 2021. Alternative Functions of Cell Cycle-Related and DNA Repair Proteins in Post-  
340 mitotic Neurons. *Front. Cell Dev. Biol.* 9, 753175. <https://doi.org/10.3389/fcell.2021.753175>
- 341 Alt, F.W., Schwer, B., 2018. DNA double-strand breaks as drivers of neural genomic change, function, and disease. *DNA Repair*  
342 71, 158–163. <https://doi.org/10.1016/j.dnarep.2018.08.019>
- 343 Álvarez-Lindo, N., Suárez, T., De La Rosa, E.J., 2022. Exploring the Origin and Physiological Significance of DNA Double Strand  
344 Breaks in the Developing Neuroretina. *IJMS* 23, 6449. <https://doi.org/10.3390/ijms23126449>
- 345 An, M., Luo, R., Henion, P.D., 2002. Differentiation and maturation of zebrafish dorsal root and sympathetic ganglion neurons. *J*  
346 *of Comparative Neurology* 446, 267–275. <https://doi.org/10.1002/cne.10214>
- 347 Appel, B., Korzh, V., Glasgow, E., Thor, S., Edlund, T., Dawid, I.B., Eisen, J.S., 1995. Motoneuron fate specification revealed by  
348 patterned LIM homeobox gene expression in embryonic zebrafish. *Development* 121, 4117–4125.  
349 <https://doi.org/10.1242/dev.121.12.4117>
- 350 Artinger, K.B., Chitnis, A.B., Mercola, M., Driever, W., 1999. Zebrafish narrowminded suggests a genetic link between formation  
351 of neural crest and primary sensory neurons. *Development* 126, 3969–3979.  
352 <https://doi.org/10.1242/dev.126.18.3969>
- 353 Bañón, A., Alsina, B., 2023. Role of pioneer neurons and neuroblast behaviors on otic ganglion assembly (preprint).  
354 *Developmental Biology*. <https://doi.org/10.1101/2023.03.30.534903>
- 355 Basbaum, A.I., Bautista, D.M., Scherrer, G., Julius, D., 2009. Cellular and Molecular Mechanisms of Pain. *Cell* 139, 267–284.  
356 <https://doi.org/10.1016/j.cell.2009.09.028>
- 357 Beard, John, 1890. IV. On the early development of *Lepidosteus osseus*. — Preliminary notice. *Proc. R. Soc. Lond.* 46, 108–118.  
358 <https://doi.org/10.1098/rspl.1889.0015>



- 359 Bentley, D., Keshishian, H., 1982. Pathfinding by Peripheral Pioneer Neurons in Grasshoppers. *Science* 218, 1082–1088.  
360 <https://doi.org/10.1126/science.218.4577.1082>
- 361 Bernhardt, R.R., Chitnis, A.B., Lindamer, L., Kuwada, J.Y., 1990. Identification of spinal neurons in the embryonic and larval  
362 zebrafish. *J of Comparative Neurology* 302, 603–616. <https://doi.org/10.1002/cne.903020315>
- 363 Blader, P., Plessy, C., Strähle, U., 2003. Multiple regulatory elements with spatially and temporally distinct activities control  
364 neurogenin1 expression in primary neurons of the zebrafish embryo. *Mechanisms of Development* 120, 211–218.  
365 [https://doi.org/10.1016/S0925-4773\(02\)00413-6](https://doi.org/10.1016/S0925-4773(02)00413-6)
- 366 Burek, M.J., Oppenheim, R.W., 1996. Programmed Cell Death in the Developing Nervous System. *Brain Pathology* 6, 427–446.  
367 <https://doi.org/10.1111/j.1750-3639.1996.tb00874.x>
- 368 Cevikbas, F., Lerner, E.A., 2020. Physiology and Pathophysiology of Itch. *Physiological Reviews* 100, 945–982.  
369 <https://doi.org/10.1152/physrev.00017.2019>
- 370 Charvet, C.J., Striedter, G.F., Finlay, B.L., 2011. Evo-Devo and Brain Scaling: Candidate Developmental Mechanisms for Variation  
371 and Constancy in Vertebrate Brain Evolution. *Brain Behav Evol* 78, 248–257. <https://doi.org/10.1159/000329851>
- 372 Clarke, J.D., Hayes, B.P., Hunt, S.P., Roberts, A., 1984. Sensory physiology, anatomy and immunohistochemistry of Rohon-Beard  
373 neurones in embryos of *Xenopus laevis*. *J Physiol* 348, 511–525. <https://doi.org/10.1113/jphysiol.1984.sp015122>
- 374 Coen, L., du Pasquier, D., Le Mevel, S., Brown, S., Tata, J., Mazabraud, A., Demeneix, B.A., 2001. *Xenopus* Bcl-XL selectively  
375 protects Rohon-Beard neurons from metamorphic degeneration. *Proceedings of the National Academy of Sciences* 98,  
376 7869–7874. <https://doi.org/10.1073/pnas.141226798>
- 377 Coghill, G.E., 1914. Correlated anatomical and physiological studies of the growth of the nervous system of amphibia. *J of*  
378 *Comparative Neurology* 24, 161–232. <https://doi.org/10.1002/cne.900240205>
- 379 Cole, L.K., Ross, L.S., 2001. Apoptosis in the Developing Zebrafish Embryo. *Developmental Biology* 240, 123–142.  
380 <https://doi.org/10.1006/dbio.2001.0432>
- 381 Dekkers, M.P.J., Nikolettou, V., Barde, Y.-A., 2013. Death of developing neurons: New insights and implications for  
382 connectivity. *Journal of Cell Biology* 203, 385–393. <https://doi.org/10.1083/jcb.201306136>
- 383 Dhaka, A., Viswanath, V., Patapoutian, A., 2006. TRP ION CHANNELS AND TEMPERATURE SENSATION. *Annu. Rev. Neurosci.* 29,  
384 135–161. <https://doi.org/10.1146/annurev.neuro.29.051605.112958>
- 385 Dong, H.P., Holth, A., Ruud, M.G., Emilsen, E., Risberg, B., Davidson, B., 2011. Measurement of apoptosis in cytological specimens  
386 by flow cytometry: comparison of Annexin V, caspase cleavage and dUTP incorporation assays. *Cytopathology* 22,  
387 365–372. <https://doi.org/10.1111/j.1365-2303.2010.00811.x>
- 388 Douglass, A.D., Kraves, S., Deisseroth, K., Schier, A.F., Engert, F., 2008. Escape Behavior Elicited by Single, Channelrhodopsin-2-  
389 Evoked Spikes in Zebrafish Somatosensory Neurons. *Current Biology* 18, 1133–1137.  
390 <https://doi.org/10.1016/j.cub.2008.06.077>
- 391 Dyck, P.J., Thomas, P.K., 2005. *Peripheral neuropathy*, 4th ed. ed. Saunders, Philadelphia.
- 392 Eichler, V.B., Porter, R.A., 1981. Rohon-Beard cells in frog development: A study of temporal and spatial changes in a transient  
393 cell population. *J of Comparative Neurology* 203, 121–130. <https://doi.org/10.1002/cne.902030110>
- 394 Eisen, J., 1991. Developmental neurobiology of the zebrafish. *J. Neurosci.* 11, 311–317.  
395 <https://doi.org/10.1523/JNEUROSCI.11-02-00311.1991>
- 396 Eisen, J.S., Pike, S.H., 1991. The spt-1 mutation alters segmental arrangement and axonal development of identified neurons in  
397 the spinal cord of the embryonic zebrafish. *Neuron* 6, 767–776. [https://doi.org/10.1016/0896-6273\(91\)90173-W](https://doi.org/10.1016/0896-6273(91)90173-W)
- 398 Freud, S., 1878. Über Spinalganglien und Rückenmark des Petromyzon.
- 399 Freud, Sigmund, 1877. Über den Ursprung der hinteren Nervenwurzeln im Rückenmark von Ammocoetes (*Petromyzon*  
400 *planeri*) Sber. preuss. *Altad. Wiss.* 75, 15–30.
- 401 Frotscher, M., 1997. Dual role of Cajal-Retzius cells and reelin in cortical development. *Cell and Tissue Research* 290, 315–322.  
402 <https://doi.org/10.1007/s004410050936>
- 403 Grunwald, D.J., Kimmel, C.B., Westerfield, M., Walker, C., Streisinger, G., 1988. A neural degeneration mutation that spares  
404 primary neurons in the zebrafish. *Developmental Biology* 126, 115–128. [https://doi.org/10.1016/0012-1606\(88\)90245-X](https://doi.org/10.1016/0012-1606(88)90245-X)
- 405
- 406 Ham, T.J., Mapes, J., Kokel, D., Peterson, R.T., 2010. Live imaging of apoptotic cells in zebrafish. *FASEB j.* 24, 4336–4342.  
407 <https://doi.org/10.1096/fj.10-161018>
- 408 Harris, J.E., Whiting, H.P., 1954. Structure and Function in the Locomotory System of the Dogfish Embryo. the Myogenic Stage  
409 of Movement. *Journal of Experimental Biology* 31, 501–524. <https://doi.org/10.1242/jeb.31.4.501>
- 410 Hartenstein, V., 1993. Early pattern of neuronal differentiation in the *Xenopus* embryonic brainstem and spinal cord. *J of*  
411 *Comparative Neurology* 328, 213–231. <https://doi.org/10.1002/cne.903280205>
- 412 Henderson, K.W., Menelaou, E., Hale, M.E., 2019. Sensory neurons in the spinal cord of zebrafish and their local connectivity.  
413 *Current Opinion in Physiology* 8, 136–140. <https://doi.org/10.1016/j.cophys.2019.01.008>
- 414 Henderson, K.W., Roche, A., Menelaou, E., Hale, M.E., 2020. Hindbrain and Spinal Cord Contributions to the Cutaneous Sensory  
415 Innervation of the Larval Zebrafish Pectoral Fin. *Front. Neuroanat.* 14, 581821.  
416 <https://doi.org/10.3389/fnana.2020.581821>
- 417 Henion, P.D., Raible, D.W., Beattie, C.E., Stoesser, K.L., Weston, J.A., Eisen, J.S., 1996. Screen for mutations affecting development  
418 of zebrafish neural crest. *Dev. Genet.* 18, 11–17. [https://doi.org/10.1002/\(SICI\)1520-6408\(1996\)18:1<11::AID-DVG2>3.0.CO;2-4](https://doi.org/10.1002/(SICI)1520-6408(1996)18:1<11::AID-DVG2>3.0.CO;2-4)
- 419
- 420 Hidalgo, A., Brand, A.H., 1997. Targeted neuronal ablation: the role of pioneer neurons in guidance and fasciculation in the CNS  
421 of *Drosophila*. *Development* 124, 3253–3262. <https://doi.org/10.1242/dev.124.17.3253>
- 422 Hirata, H., Iida, A. (Eds.), 2018. *Zebrafish, Medaka, and Other Small Fishes: New Model Animals in Biology, Medicine, and*  
423 *Beyond*, 1st ed. 2018. ed. Springer Singapore : Imprint: Springer, Singapore. [https://doi.org/10.1007/978-981-13-](https://doi.org/10.1007/978-981-13-1879-5)  
424 1879-5



- 425 Honjo, Y., Payne, L., Eisen, J.S., 2011. Somatosensory mechanisms in zebrafish lacking dorsal root ganglia: Somatosensory  
426 mechanisms in juvenile zebrafish. *Journal of Anatomy* 218, 271–276. [https://doi.org/10.1111/j.1469-](https://doi.org/10.1111/j.1469-7580.2010.01337.x)  
427 7580.2010.01337.x
- 428 Hubbard, J.M., Böhm, U.L., Prendergast, A., Tseng, P.-E.B., Newman, M., Stokes, C., Wyart, C., 2016. Intraspinal Sensory Neurons  
429 Provide Powerful Inhibition to Motor Circuits Ensuring Postural Control during Locomotion. *Current Biology* 26,  
430 2841–2853. <https://doi.org/10.1016/j.cub.2016.08.026>
- 431 Hughes, A., 1957. The development of the primary sensory system in *Xenopus laevis* (Daudin). *J Anat* 91, 323–338.
- 432 Jacobson, M., 1981. Rohon-Beard neurons arise from a substitute ancestral cell after removal of the cell from which they  
433 normally arise in the 16-cell frog embryo. *J. Neurosci.* 1, 923–927. [https://doi.org/10.1523/JNEUROSCI.01-08-](https://doi.org/10.1523/JNEUROSCI.01-08-00923.1981)  
434 00923.1981
- 435 Joya, X., Garcia-Algar, O., Vall, O., Pujades, C., 2014. Transient Exposure to Ethanol during Zebrafish Embryogenesis Results in  
436 Defects in Neuronal Differentiation: An Alternative Model System to Study FASD. *PLoS ONE* 9, e112851.  
437 <https://doi.org/10.1371/journal.pone.0112851>
- 438 Kaji, T., Artinger, K.B., 2004. *dlx3b* and *dlx4b* function in the development of Rohon-Beard sensory neurons and trigeminal  
439 placode in the zebrafish neurula. *Developmental Biology* 276, 523–540. <https://doi.org/10.1016/j.ydbio.2004.09.020>
- 440 Kanungo, J., Li, B.-S., Zheng, Y., Pant, H.C., 2006. Cyclin-dependent kinase 5 influences Rohon-Beard neuron survival in  
441 zebrafish. *J Neurochem* 99, 251–259. <https://doi.org/10.1111/j.1471-4159.2006.04114.x>
- 442 Kellermeyer, R., Heydman, L., Mastick, G., Kidd, T., 2018. The Role of Apoptotic Signaling in Axon Guidance. *JDB* 6, 24.  
443 <https://doi.org/10.3390/jdb6040024>
- 444 Kerr, J.F.R., Wyllie, A.H., Currie, A.R., 1972. Apoptosis: A Basic Biological Phenomenon with Wideranging Implications in Tissue  
445 Kinetics. *Br J Cancer* 26, 239–257. <https://doi.org/10.1038/bjc.1972.33>
- 446 Kimmel, C.B. and Westerfield, M., 1990. Primary neurons of the zebrafish. *Signals and sense* 561–588.
- 447 Kimmel, C.B., Ballard, W.W., Kimmel, S.R., Ullmann, B., Schilling, T.F., 1995. Stages of embryonic development of the zebrafish.  
448 *Developmental Dynamics* 203, 253–310. <https://doi.org/10.1002/aja.1002030302>
- 449 Knafo, S., Fidelin, K., Prendergast, A., Tseng, P.-E.B., Parrin, A., Dickey, C., Böhm, U.L., Figueiredo, S.N., Thouvenin, O., Pascal-  
450 Moussellard, H., Wyart, C., 2017. Mechanosensory neurons control the timing of spinal microcircuit selection during  
451 locomotion. *eLife* 6, e25260. <https://doi.org/10.7554/eLife.25260>
- 452 Kollros, J.J., Bovbjerg, A.M., 1997. Growth and death of Rohon-Beard cells in *Rana pipiens* and *Ceratophrys ornata*. *J. Morphol.*  
453 232, 67–78. [https://doi.org/10.1002/\(SICI\)1097-4687\(199704\)232:1<67::AID-JMOR4>3.0.CO;2-L](https://doi.org/10.1002/(SICI)1097-4687(199704)232:1<67::AID-JMOR4>3.0.CO;2-L)
- 454 Kucenas, S., Soto, F., Cox, J.A., Voigt, M.M., 2006. Selective labeling of central and peripheral sensory neurons in the developing  
455 zebrafish using P2X(3) receptor subunit transgenes. *Neuroscience* 138, 641–652.  
456 <https://doi.org/10.1016/j.neuroscience.2005.11.058>
- 457 Kwan, K.M., Otsuna, H., Kidokoro, H., Carney, K.R., Saijoh, Y., Chien, C.-B., 2012. A complex choreography of cell movements  
458 shapes the vertebrate eye. *Development* 139, 359–372. <https://doi.org/10.1242/dev.071407>
- 459 Lamborghini, J.E., 1987. Disappearance of Rohon-Beard neurons from the spinal cord of larval *Xenopus laevis*. *J of Comparative*  
460 *Neurology* 264, 47–55. <https://doi.org/10.1002/cne.902640105>
- 461 Le Douarin, N., Kalcheim, C., 1999. The neural crest, 2nd ed. ed, *Developmental and cell biology series*. Cambridge university  
462 press, Cambridge.
- 463 Madabhushi, R., Gao, F., Pfennig, A.R., Pan, L., Yamakawa, S., Seo, J., Rueda, R., Phan, T.X., Yamakawa, H., Pao, P.-C., Stott, R.T.,  
464 Gjonneska, E., Nott, A., Cho, S., Kellis, M., Tsai, L.-H., 2015. Activity-Induced DNA Breaks Govern the Expression of  
465 Neuronal Early-Response Genes. *Cell* 161, 1592–1605. <https://doi.org/10.1016/j.cell.2015.05.032>
- 466 Malin, J.Z., Shaham, S., 2015. Cell Death in *C. elegans* Development, in: *Current Topics in Developmental Biology*. Elsevier, pp. 1–  
467 42. <https://doi.org/10.1016/bs.ctdb.2015.07.018>
- 468 Martin, S.C., Sandell, J.H., Heinrich, G., 1998. Zebrafish TrkC1 and TrkC2 Receptors Define Two Different Cell Populations in the  
469 Nervous System during the Period of Axonogenesis. *Developmental Biology* 195, 114–130.  
470 <https://doi.org/10.1006/dbio.1997.8839>
- 471 Mazaheri, F., Breus, O., Durdu, S., Haas, P., Wittbrodt, J., Gilmour, D., Peri, F., 2014. Distinct roles for BAI1 and TIM-4 in the  
472 engulfment of dying neurons by microglia. *Nat Commun* 5, 4046. <https://doi.org/10.1038/ncomms5046>
- 473 McConnell, S.K., Ghosh, A., Shatz, C.J., 1989. Subplate Neurons Pioneer the First Axon Pathway from the Cerebral Cortex. *Science*  
474 245, 978–982. <https://doi.org/10.1126/science.2475909>
- 475 Meltzer, S., Santiago, C., Sharma, N., Ginty, D.D., 2021. The cellular and molecular basis of somatosensory neuron development.  
476 *Neuron* 109, 3736–3757. <https://doi.org/10.1016/j.neuron.2021.09.004>
- 477 Metcalfe, W.K., Myers, P.Z., Trevarrowf, B., Basst, M.B., Kimmel, C.B., 1990. Primary neurons that express the L2/HNK-1  
478 carbohydrate during early development in the zebrafish. *Development* 110, 491–504.  
479 <https://doi.org/10.1242/dev.110.2.491>
- 480 Metcalfe, W.K., Westerfield, M., 1990. Primary Motoneurons of the Zebrafish, in: Raymond, P.A., Easter, S.S., Innocenti, G.M.  
481 (Eds.), *Systems Approaches to Developmental Neurobiology*. Springer US, Boston, MA, pp. 41–47.  
482 [https://doi.org/10.1007/978-1-4684-7281-3\\_5](https://doi.org/10.1007/978-1-4684-7281-3_5)
- 483 Meyer, G., Soria, J.M., Martínez-Galán, J.R., Martínez-Clemente, B., Fairén, A., 1998. Different origins and developmental  
484 histories of transient neurons in the marginal zone of the fetal and neonatal rat cortex. *J. Comp. Neurol.* 397, 493–518.  
485 [https://doi.org/10.1002/\(SICI\)1096-9861\(19980810\)397:4<493::AID-CNE4>3.0.CO;2-X](https://doi.org/10.1002/(SICI)1096-9861(19980810)397:4<493::AID-CNE4>3.0.CO;2-X)
- 486 Moreno, R.L., Ribera, A.B., 2014. Spinal neurons require *Islet1* for subtype-specific differentiation of electrical excitability.  
487 *Neural Dev* 9, 19. <https://doi.org/10.1186/1749-8104-9-19>
- 488 Mukherjee, A., Williams, D.W., 2017. More alive than dead: non-apoptotic roles for caspases in neuronal development, plasticity  
489 and disease. *Cell Death Differ* 24, 1411–1421. <https://doi.org/10.1038/cdd.2017.64>

- 490 Nakano, Y., Fujita, M., Ogino, K., Saint-Amant, L., Kinoshita, T., Oda, Y., Hirata, H., 2010. Biogenesis of GPI-anchored proteins is  
491 essential for surface expression of sodium channels in zebrafish Rohon-Beard neurons to respond to  
492 mechanosensory stimulation. *Development* 137, 1689–1698. <https://doi.org/10.1242/dev.047464>
- 493 Nieuwenhuys, R., 1964. Comparative Anatomy of the Spinal Cord, in: *Progress in Brain Research*. Elsevier, pp. 1–57.  
494 [https://doi.org/10.1016/S0079-6123\(08\)64043-1](https://doi.org/10.1016/S0079-6123(08)64043-1)
- 495 Nishikawa, A., 2012. Cell Interaction During Larval-To-Adult Muscle Remodeling in the Frog, *Xenopus laevis*, in: Gowder, S.  
496 (Ed.), *Cell Interaction*. InTech. <https://doi.org/10.5772/47757>
- 497 Nordlander, R.H., 1989. HNK-1 marks earliest axonal outgrowth in *Xenopus*. *Developmental Brain Research* 50, 147–153.  
498 [https://doi.org/10.1016/0165-3806\(89\)90135-1](https://doi.org/10.1016/0165-3806(89)90135-1)
- 499 O'Brien, G.S., Rieger, S., Wang, F., Smolen, G.A., Gonzalez, R.E., Buchanan, J., Sagasti, A., 2012. Coordinate development of skin  
500 cells and cutaneous sensory axons in zebrafish. *J Comp Neurol* 520, 816–831. <https://doi.org/10.1002/cne.22791>
- 501 Ogino, K., Hirata, H., 2018. Rohon-Beard Neuron in Zebrafish, in: Hirata, H., Iida, A. (Eds.), *Zebrafish, Medaka, and Other Small*  
502 *Fishes*. Springer Singapore, Singapore, pp. 59–81. [https://doi.org/10.1007/978-981-13-1879-5\\_4](https://doi.org/10.1007/978-981-13-1879-5_4)
- 503 Palanca, A.M.S., Lee, S.-L., Yee, L.E., Joe-Wong, C., Trinh, L.A., Hiroyasu, E., Husain, M., Fraser, S.E., Pellegrini, M., Sagasti, A., 2013.  
504 New transgenic reporters identify somatosensory neuron subtypes in larval zebrafish. *Devel Neurobio* 73, 152–167.  
505 <https://doi.org/10.1002/dneu.22049>
- 506 Park, B.-Y., Hong, C.-S., Weaver, J.R., Rosocha, E.M., Saint-Jeannet, J.-P., 2012. Xam1/Runx1 is required for the specification of  
507 Rohon-Beard sensory neurons in *Xenopus*. *Developmental Biology* 362, 65–75.  
508 <https://doi.org/10.1016/j.ydbio.2011.11.016>
- 509 Patten, S.A., Sihra, R.K., Dhama, K.S., Coutts, C.A., Ali, D.W., 2007. Differential expression of PKC isoforms in developing zebrafish.  
510 *Intl J of Devlp Neuroscience* 25, 155–164. <https://doi.org/10.1016/j.ijdevneu.2007.02.003>
- 511 Pineda, R.H., Svoboda, K.R., Wright, M.A., Taylor, A.D., Novak, A.E., Gamse, J.T., Eisen, J.S., Ribera, A.B., 2006. Knockdown of Nav  
512 1.6a Na<sup>+</sup> channels affects zebrafish motoneuron development. *Development* 133, 3827–3836.  
513 <https://doi.org/10.1242/dev.02559>
- 514 Pittman, A.J., Law, M.-Y., Chien, C.-B., 2008. Pathfinding in a large vertebrate axon tract: isotopic interactions guide retinotectal  
515 axons at multiple choice points. *Development* 135, 2865–2871. <https://doi.org/10.1242/dev.025049>
- 516 Pop, S., Chen, C.-L., Sproston, C.J., Kondo, S., Ramdya, P., Williams, D.W., 2020. Extensive and diverse patterns of cell death  
517 sculpt neural networks in insects. *eLife* 9, e59566. <https://doi.org/10.7554/eLife.59566>
- 518 Raible, D.W., Eisen, J.S., 1994. Restriction of neural crest cell fate in the trunk of the embryonic zebrafish. *Development* 120,  
519 495–503. <https://doi.org/10.1242/dev.120.3.495>
- 520 Raible, D.W., Wood, A., Hodsdon, W., Henion, P.D., Weston, J.A., Eisen, J.S., 1992. Segregation and early dispersal of neural crest  
521 cells in the embryonic zebrafish. *Dev. Dyn.* 195, 29–42. <https://doi.org/10.1002/aja.1001950104>
- 522 Rasmussen, J.P., Vo, N.-T., Sagasti, A., 2018. Fish Scales Dictate the Pattern of Adult Skin Innervation and Vascularization.  
523 *Developmental Cell* 46, 344–359.e4. <https://doi.org/10.1016/j.devcel.2018.06.019>
- 524 Reyes, R., Haendel, M., Grant, D., Melancon, E., Eisen, J.S., 2004. Slow degeneration of zebrafish Rohon-Beard neurons during  
525 programmed cell death. *Dev. Dyn.* 229, 30–41. <https://doi.org/10.1002/dvdy.10488>
- 526 Roberts, A., Clarke, J.D., 1982. The neuroanatomy of an amphibian embryo spinal cord. *Philos Trans R Soc Lond B Biol Sci* 296,  
527 195–212. <https://doi.org/10.1098/rstb.1982.0002>
- 528 Roberts, A., Smyth, D., 1974. The development of a dual touch sensory system in embryos of the amphibian *Xenopus laevis*. *J.*  
529 *Comp. Physiol.* 88, 31–42. <https://doi.org/10.1007/BF00695921>
- 530 Rohon, Josef Victor, 1884. Histogenese des Rückenmarkes der Forelle. *Akad Wiss Math.*
- 531 Rossi, C.C., Hernandez-Lagunas, L., Zhang, C., Choi, I.F., Kwok, L., Klymkowsky, M., Bruk Artinger, K., 2008. Rohon-Beard sensory  
532 neurons are induced by BMP4 expressing non-neural ectoderm in *Xenopus laevis*. *Developmental Biology* 314, 351–  
533 361. <https://doi.org/10.1016/j.ydbio.2007.11.036>
- 534 Rossi, C.C., Kaji, T., Artinger, K.B., 2009. Transcriptional control of Rohon-Beard sensory neuron development at the neural  
535 plate border. *Dev. Dyn.* 238, 931–943. <https://doi.org/10.1002/dvdy.21915>
- 536 Sagasti, A., Guido, M.R., Raible, D.W., Schier, A.F., 2005. Repulsive Interactions Shape the Morphologies and Functional  
537 Arrangement of Zebrafish Peripheral Sensory Arbors. *Current Biology* 15, 804–814.  
538 <https://doi.org/10.1016/j.cub.2005.03.048>
- 539 Saint-Amant, L., Drapeau, P., 1998. Time course of the development of motor behaviors in the zebrafish embryo. *J. Neurobiol.*  
540 37, 622–632. [https://doi.org/10.1002/\(SICI\)1097-4695\(199812\)37:4<622::AID-NEU10>3.0.CO;2-S](https://doi.org/10.1002/(SICI)1097-4695(199812)37:4<622::AID-NEU10>3.0.CO;2-S)
- 541 Schindelin, J., Arganda-Carreras, I., Frise, E., Kaynig, V., Longair, M., Pietzsch, T., Preibisch, S., Rueden, C., Saalfeld, S., Schmid, B.,  
542 Tinevez, J.-Y., White, D.J., Hartenstein, V., Eliceiri, K., Tomancak, P., Cardona, A., 2012. Fiji: an open-source platform for  
543 biological-image analysis. *Nat Methods* 9, 676–682. <https://doi.org/10.1038/nmeth.2019>
- 544 Segawa, H., Miyashita, T., Hirate, Y., Higashijima, S., Chino, N., Uyemura, K., Kikuchi, Y., Okamoto, H., 2001. Functional  
545 Repression of Islet-2 by Disruption of Complex with Ldb Impairs Peripheral Axonal Outgrowth in Embryonic  
546 Zebrafish. *Neuron* 30, 423–436. [https://doi.org/10.1016/S0896-6273\(01\)00283-5](https://doi.org/10.1016/S0896-6273(01)00283-5)
- 547 Shorey, M., Rao, K., Stone, M.C., Mattie, F.J., Sagasti, A., Rolls, M.M., 2021. Microtubule organization of vertebrate sensory  
548 neurons in vivo. *Developmental Biology* 478, 1–12. <https://doi.org/10.1016/j.ydbio.2021.06.007>
- 549 Spitzer, N.C., 1984. What do rohon-beard cells do? *Trends in Neurosciences* 7, 224–225. <https://doi.org/10.1016/S0166->  
550 [2236\(84\)80208-8](https://doi.org/10.1016/S0166-2236(84)80208-8)
- 551 Spitzer, N.C., 1982. Voltage- and stage-development uncoupling of Rohon-Beard neurones during embryonic development of  
552 *Xenopus tadpoles*. *The Journal of Physiology* 330, 145–162. <https://doi.org/10.1113/jphysiol.1982.sp014334>
- 553 Suster, M.L., Kikuta, H., Urasaki, A., Asakawa, K., Kawakami, K., 2009. Transgenesis in Zebrafish with the Tol2 Transposon  
554 System, in: Cartwright, E.J. (Ed.), *Transgenesis Techniques, Methods in Molecular Biology*. Humana Press, Totowa, NJ,  
555 pp. 41–63. [https://doi.org/10.1007/978-1-60327-019-9\\_3](https://doi.org/10.1007/978-1-60327-019-9_3)

- 556 Svoboda, K.R., Linares, A.E., Ribera, A.B., 2001. Activity regulates programmed cell death of zebrafish Rohon-Beard neurons.  
557 *Development* 128, 3511–3520. <https://doi.org/10.1242/dev.128.18.3511>
- 558 Takamiya, M., Campos-Ortega, J.A., 2006. Hedgehog signalling controls zebrafish neural keel morphogenesis via its level-  
559 dependent effects on neurogenesis. *Developmental Dynamics* 235, 978–997. <https://doi.org/10.1002/dvdy.20720>
- 560 Tamme, R., Wells, S., Conran, J.G., Lardelli, M., 2002. The identity and distribution of neural cells expressing the mesodermal  
561 determinant spadetail. *BMC Dev Biol* 2, 9. <https://doi.org/10.1186/1471-213X-2-9>
- 562 Theveneau, E., Mayor, R., 2012. Neural crest delamination and migration: From epithelium-to-mesenchyme transition to  
563 collective cell migration. *Developmental Biology* 366, 34–54. <https://doi.org/10.1016/j.ydbio.2011.12.041>
- 564 Tongiorgi, E., Bernhardt, R.R., Schachner, M., 1995. Zebrafish neurons express two L1-related molecules during early  
565 axonogenesis. *J of Neuroscience Research* 42, 547–561. <https://doi.org/10.1002/jnr.490420413>
- 566 Tuttle, A.M., Miller, L.N., Royer, L.J., Wen, H., Kelly, J.J., Calistri, N.L., Heiser, L.M., Nechiporuk, A.V., 2023. Single-cell analysis of  
567 Rohon-Beard neurons implicates Fgf signaling in axon maintenance and cell survival (preprint). *Neuroscience*.  
568 <https://doi.org/10.1101/2023.08.26.554953>
- 569 Uemura, O., Okada, Y., Ando, H., Guedj, M., Higashijima, S., Shimazaki, T., Chino, N., Okano, H., Okamoto, H., 2005. Comparative  
570 functional genomics revealed conservation and diversification of three enhancers of the *isl1* gene for motor and  
571 sensory neuron-specific expression. *Developmental Biology* 278, 587–606.  
572 <https://doi.org/10.1016/j.ydbio.2004.11.031>
- 573 Umeda, K., Ishizuka, T., Yawo, H., Shoji, W., 2016. Position- and quantity-dependent responses in zebrafish turning behavior. *Sci*  
574 *Rep* 6, 27888. <https://doi.org/10.1038/srep27888>
- 575 Venero Galanternik, M., Navajas Acedo, J., Romero-Carvajal, A., Piotrowski, T., 2016. Imaging collective cell migration and hair  
576 cell regeneration in the sensory lateral line, in: *Methods in Cell Biology*. Elsevier, pp. 211–256.  
577 <https://doi.org/10.1016/bs.mcb.2016.01.004>
- 578 Whitlock, K.E., Westerfield, M., 1998. A Transient Population of Neurons Pioneers the Olfactory Pathway in the Zebrafish. *J.*  
579 *Neurosci.* 18, 8919–8927. <https://doi.org/10.1523/JNEUROSCI.18-21-08919.1998>
- 580 Williams, J.A., Barrios, A., Gatchalian, C., Rubin, L., Wilson, S.W., Holder, N., 2000. Programmed Cell Death in Zebrafish Rohon  
581 Beard Neurons Is Influenced by TrkC1/NT-3 Signaling. *Developmental Biology* 226, 220–230.  
582 <https://doi.org/10.1006/dbio.2000.9860>
- 583 Williams, K., Ribera, A.B., 2020. Long-lived zebrafish Rohon-Beard cells. *Developmental Biology* 464, 45–52.  
584 <https://doi.org/10.1016/j.ydbio.2020.05.003>
- 585 Wilson, S.W., Easter, S.S., 1991. A pioneering growth cone in the embryonic zebrafish brain. *Proc. Natl. Acad. Sci. U.S.A.* 88,  
586 2293–2296. <https://doi.org/10.1073/pnas.88.6.2293>
- 587 Won, Y.-J., Ono, F., Ikeda, S.R., 2012. Characterization of Na<sup>+</sup> and Ca<sup>2+</sup> channels in zebrafish dorsal root ganglion neurons. *PLoS*  
588 *One* 7, e42602. <https://doi.org/10.1371/journal.pone.0042602>
- 589 Won, Y.-J., Ono, F., Ikeda, S.R., 2011. Identification and Modulation of Voltage-Gated Ca<sup>2+</sup> Currents in Zebrafish Rohon-Beard  
590 Neurons. *Journal of Neurophysiology* 105, 442–453. <https://doi.org/10.1152/jn.00625.2010>
- 591 Woolf, C.J., Ma, Q., 2007. Nociceptors—Noxious Stimulus Detectors. *Neuron* 55, 353–364.  
592 <https://doi.org/10.1016/j.neuron.2007.07.016>
- 593 Wright, M.A., Ribera, A.B., 2010. Brain-Derived Neurotrophic Factor Mediates Non-Cell-Autonomous Regulation of Sensory  
594 Neuron Position and Identity. *J. Neurosci.* 30, 14513–14521. <https://doi.org/10.1523/JNEUROSCI.4025-10.2010>
- 595



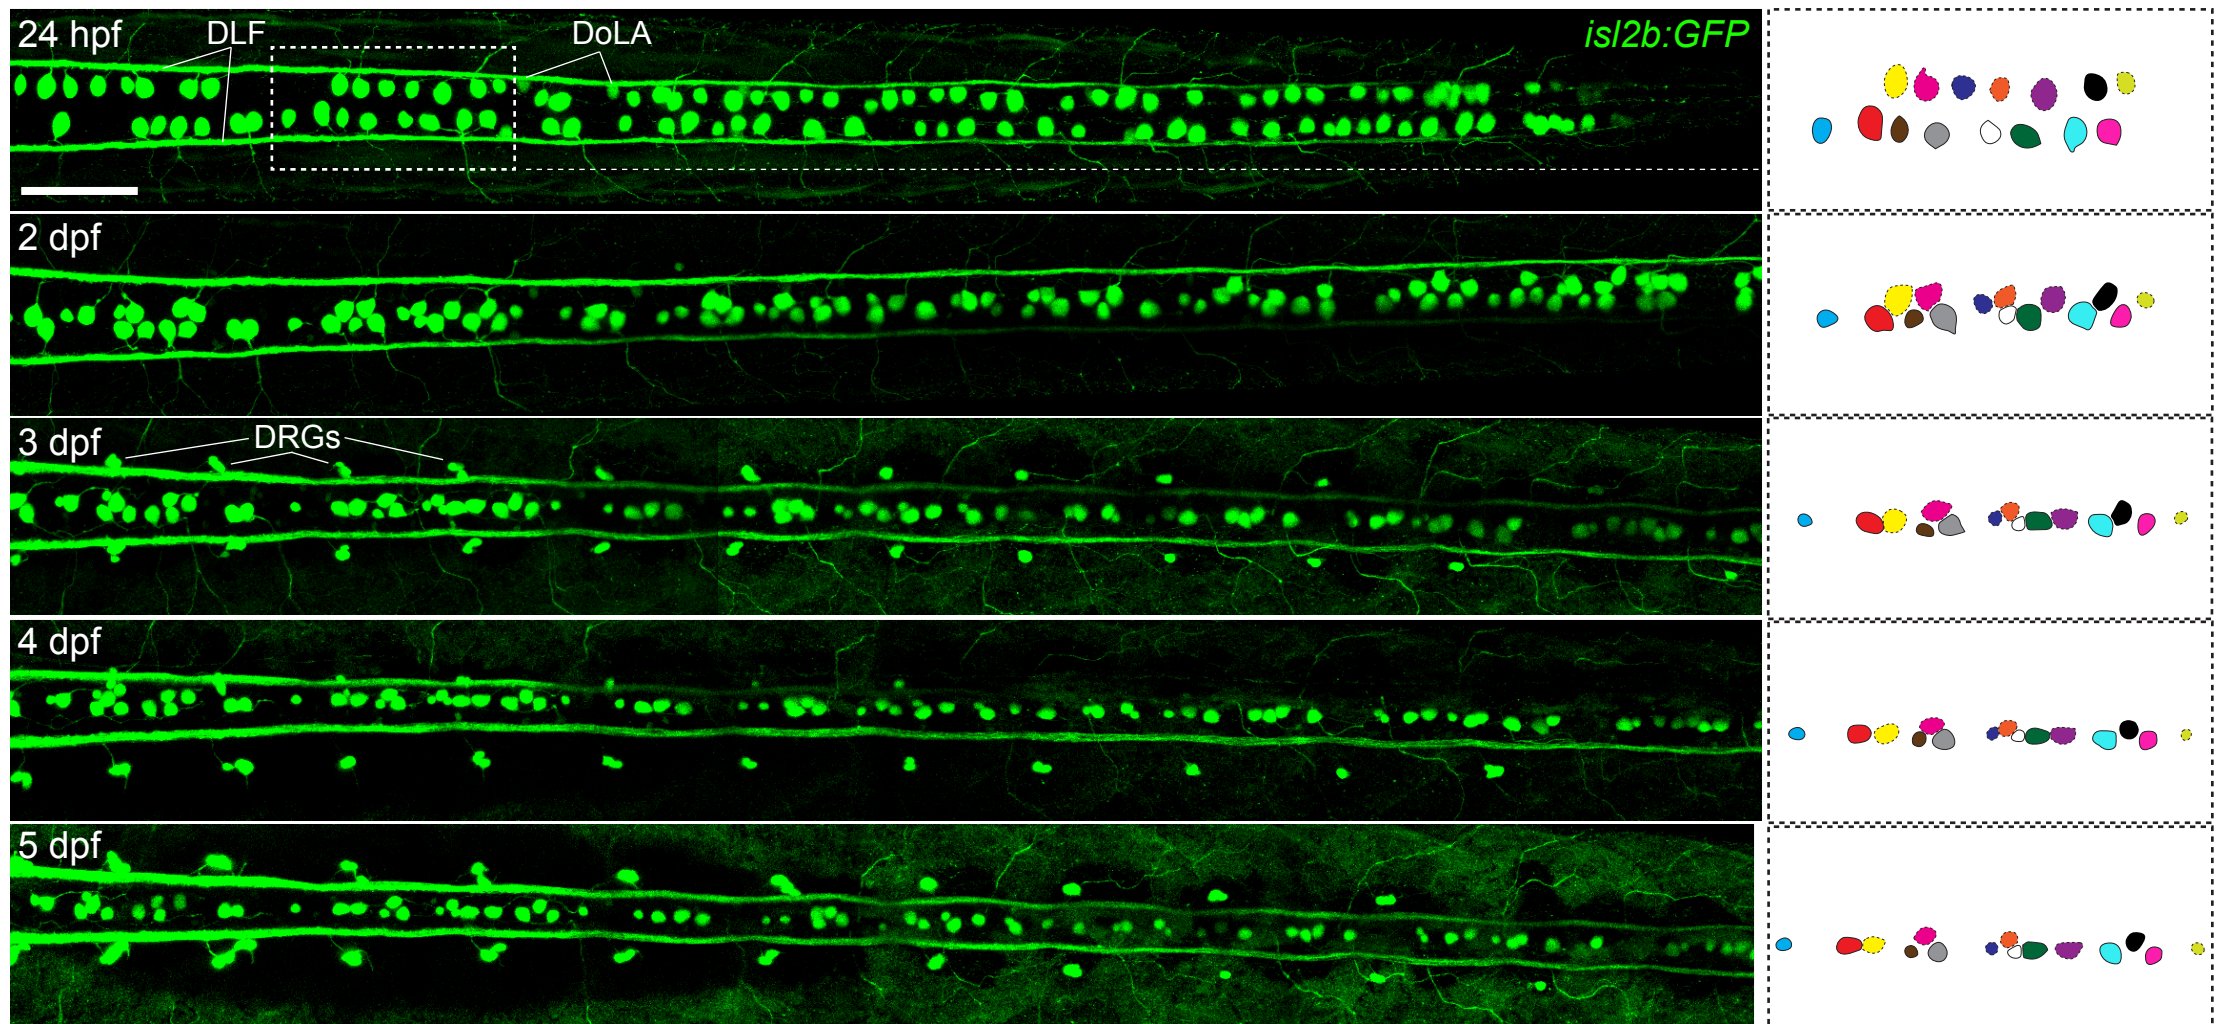

**Figure 1. All *isI2b:GFP*<sup>+</sup> RBs present at 24 hpf can be accounted for at 5 dpf.** Repeated dorsal in vivo imaging of the same larva from the first until the fifth day of life reveals that all RBs present in the trunk survive during this period of time. The drawings on the right represent the same RBs throughout time, starting from the dotted box area at 24 hpf. Scale bar equals 100  $\mu$ m. hpf – hours post-fertilization; dpf - days post-fertilization; DoLA – Dorsal Longitudinal Ascending neurons; DRG – Dorsal Root Ganglia; DLF - Dorsal Longitudinal Fasciculi

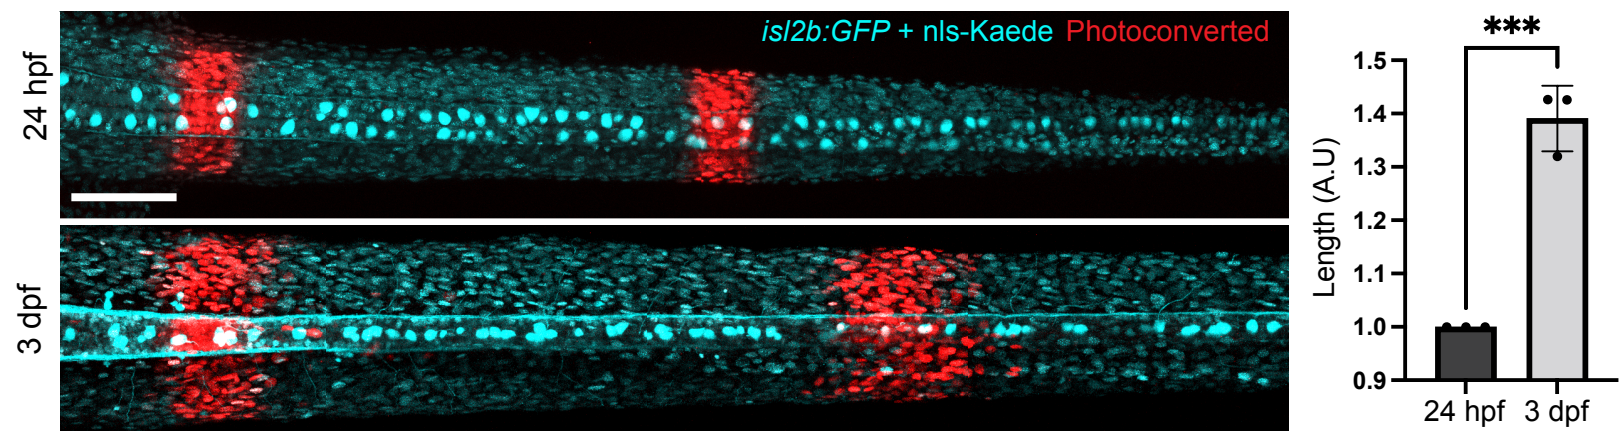

**Figure 2. Photoconversion indicates the concomitant trunk elongation and medial convergence of RBs.** Two stripes were photoconverted on the trunk of *isl2b:GFP* fish injected with a photoconvertible nuclear-localized Kaede. The images were aligned using the anteriormost photoconverted area, revealing the space between the two stripes increased (n=3; Mean length of 1 at 24hpf, versus 1.391 at 72hpf). Asterisks indicate statistical significance. Scale bar equals 100um. hpf - hours post-fertilization; dpf- days post-fertilization

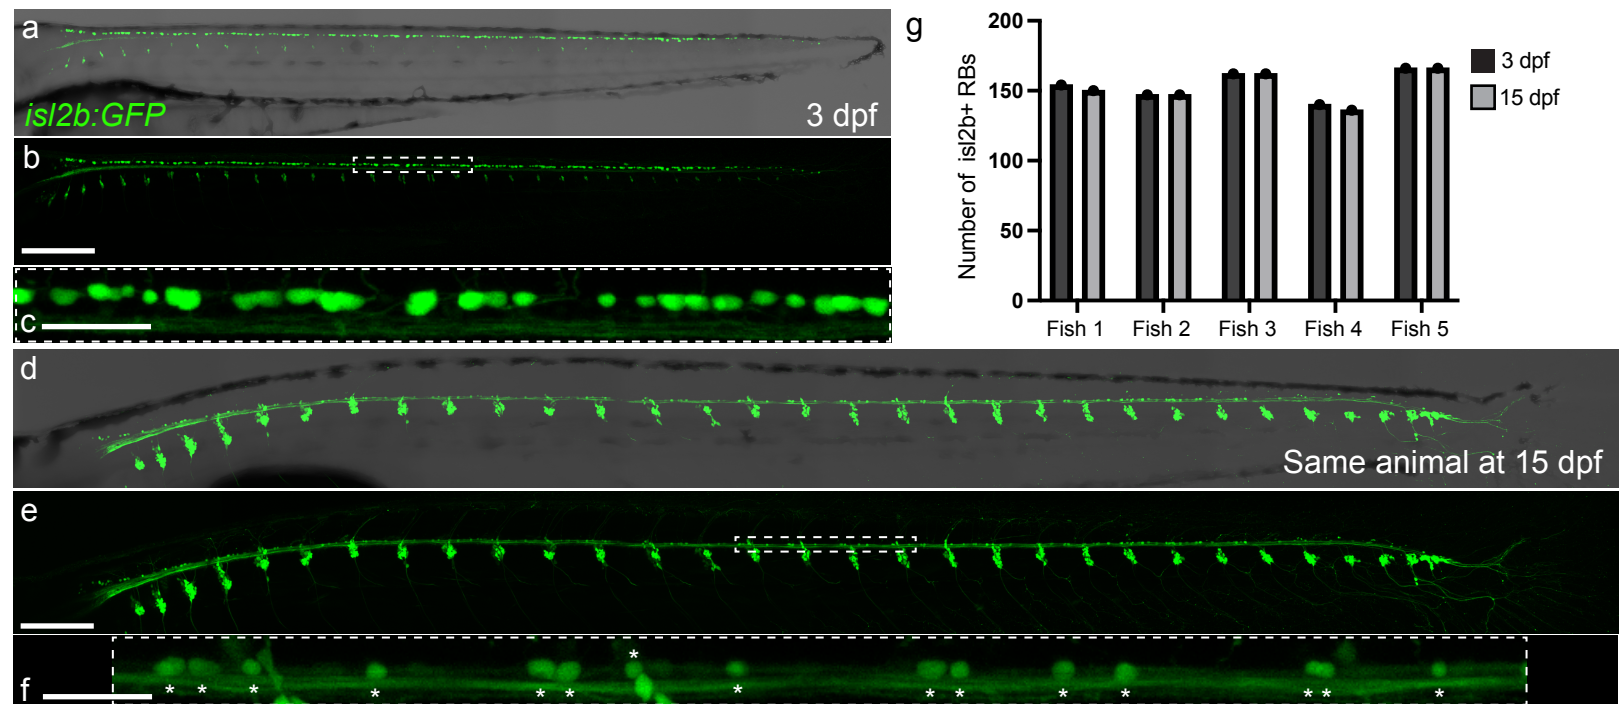

**Figure 3. The vast majority of RBs survive until juvenile stages.** Imaging of the same *isl2b:GFP* transgenic animal at 3 (a-c) and 15 dpf (d-f) show that the majority of RBs are still present in the spinal cord of 15 dpf zebrafish and the distance between them increased. (c and f) Both images show the same area between DRGs number 16 and 19 (delineated in b and e). Asterisks in (f) label RBs at 15 dpf. Because of the time resolution, the exact RB identity between the 3 and 15 dpf time points could not be established. (g) Quantification of the number of RBs per animal at 3 and 15 dpf (exact numbers in Supplementary Table 1). Scale bars in (a-b and d-e) equal 250um, and 50um in (c) and (f). Images from 3 dpf and 15 dpf are to scale to each other to reflect the amount of growth. dpf — days post-fertilization.



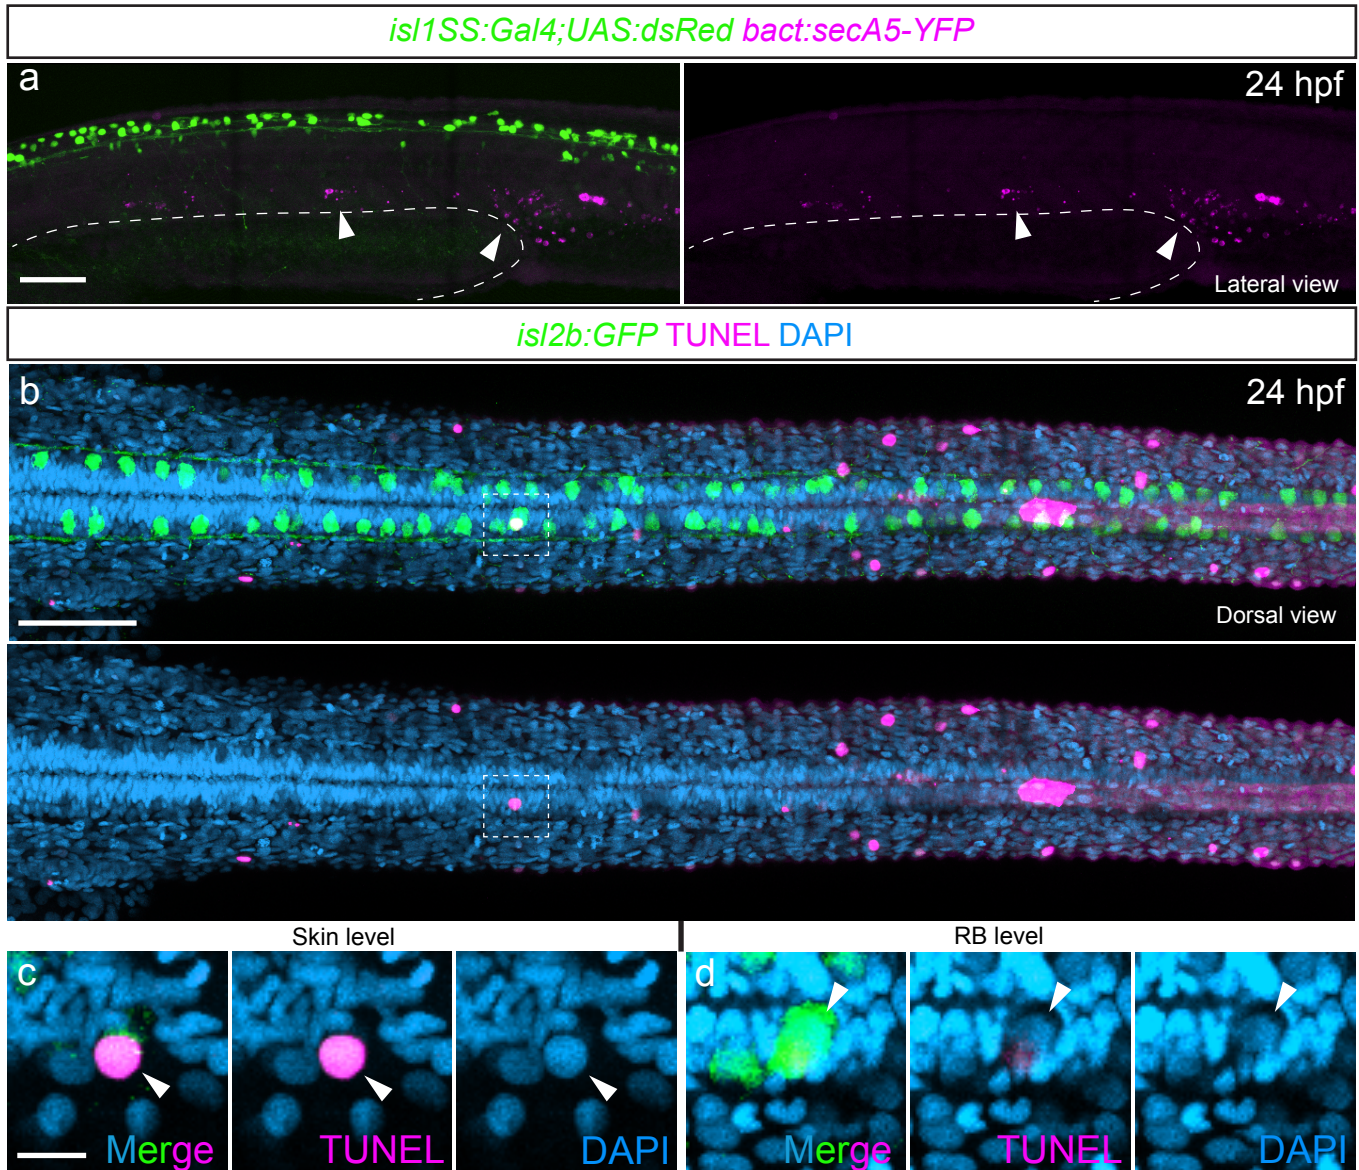

**Figure 4. RBs do not show *secA5*-YFP (Annexin V) or TUNEL signal at 24 hpf.** Images showing lateral (upper; a) and dorsal views (lower; b-d) of two different experiments assessing cell death. a. *secA5*-YFP is driven by a ubiquitous beta-Actin promoter, and none of the dsRed+ RBs were *secA5*-YFP+. Some *secA5*-YFP+ cells around the pronephros area were observed were *SecA5*-YFP+ (arrows) (n=3). The yolk extension is delineated by a broken line. b. A dorsal view of an *isl2b:GFP*+ embryo stained for TUNEL. None of the RBs were TUNEL positive, but some surrounding cells were (n=9). Inset (dashed line in b) shows the TUNEL+ nucleus of a skin cell (c, arrowhead) and the RB immediately underneath (d, arrowhead). Scale bars equal 100um in a- b, and 10um in c-d, respectively. hpf - hours post-fertilization.



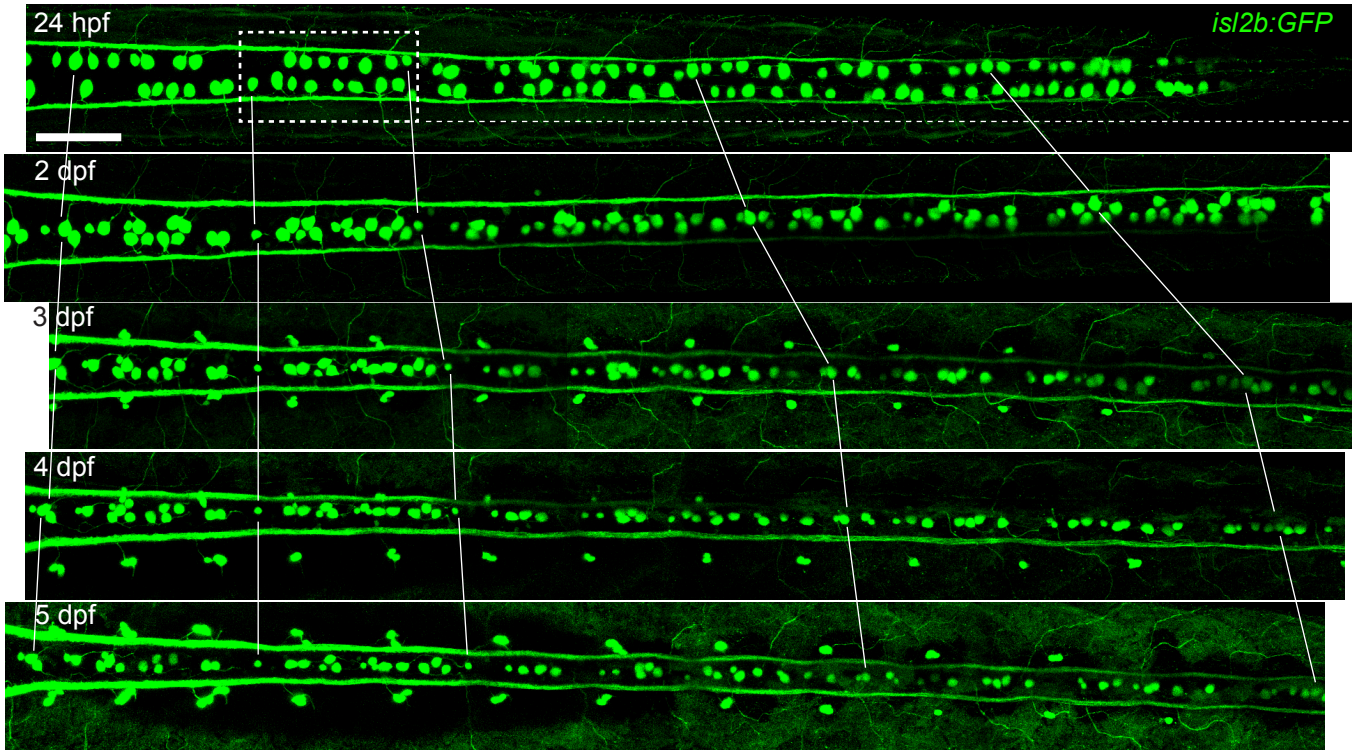

**Supplementary Figure 1 to Figure 1.** Lines show the amount of displacement the *isl2b:GFP*+ RBs (same one per line) undergo in the antero-posterior axis in Figure 1. Error bar equals 100um. hpf – hours post-fertilization; dpf - days post-fertilization

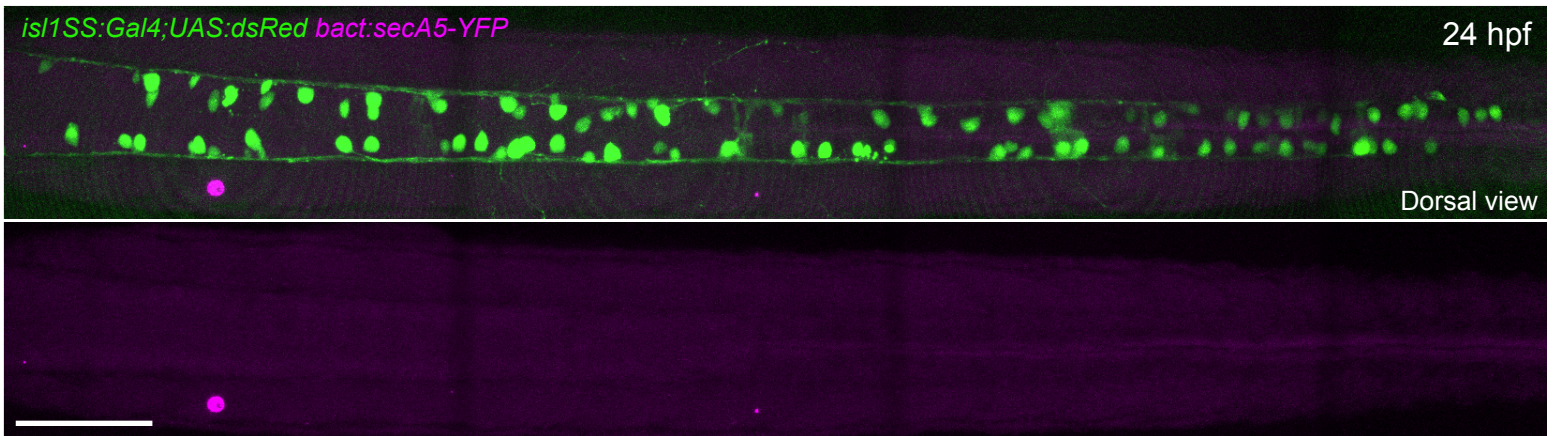

**Supplementary Figure 2 to Figure 3.** Images showing a dorsal view of a *secA5-YFP*+ transgenic embryo. *secA5-YFP* is driven by a ubiquitous beta-Actin promoter. None of the RBs of the trunk were *secA5-YFP*+. Scale bar equals 100um.
